# Supplementary material
Source: Royal Society of Chemistry journal article supplement (doi:10.1039/d6cc02835g)
Supplement: d6cc02835g1.pdf [file d6cc02835g1.pdf]

*Supplementary Information for*

## **Expanded benzo-fused dihydro-azulenoazulenes – Tuning electronic properties**

*Cecilie Rindom,<sup>a</sup> Frédéric Lirette,<sup>b</sup> Jérémie Ouellette,<sup>b</sup> Florim Seljmani,<sup>a</sup> Viktor Bliksted Roug Pedersen,<sup>a</sup> Jean-François Morin,<sup>b</sup> and Mogens Brøndsted Nielsen<sup>\*a</sup>*

<sup>a</sup>*Department of Chemistry, University of Copenhagen, Universitetsparken 5, 2100, Copenhagen Ø, Denmark.  
E-mail: mbn@chem.ku.dk.*

<sup>b</sup>*Département de chimie and Centre de Recherche sur les Matériaux Avancés (CERMA), Université Laval,  
1045 Ave de la Médecine, Québec, QC, Canada.*

### **Contents**

|                                          |     |
|------------------------------------------|-----|
| General Methods.....                     | S2  |
| UV-Vis Absorption Spectroscopy .....     | S2  |
| Electrochemistry .....                   | S2  |
| Synthetic Protocols .....                | S3  |
| NMR Spectra .....                        | S7  |
| UV-Vis Absorption Spectroscopy Data..... | S18 |
| Electrochemistry Data .....              | S18 |
| X-Ray Crystallography.....               | S19 |
| References .....                         | S40 |

## General Methods

Chemical reagents were purchased from Sigma-Aldrich Co., Canada, Oakwood Products, Inc., or 1PlusChem, Inc. and used as received. Flash column chromatography was performed using silica gel (Silica gel 60 (43–60  $\mu\text{m}$ ) purchased from VWR). All solvents used were HPLC grade from VWR. Anhydrous Tetrahydrofuran (THF) was obtained by distillation from sodium and benzophenone under  $\text{N}_2$ . NMR spectra were recorded on an Agilent DD2 500 MHz instrument or a Bruker 500 MHz instrument with a cryo-inverse probe.  $^1\text{H}$  and  $^{13}\text{C}$  spectra were recorded at 500 MHz and 126 MHz, respectively. Spectra were recorded at 25  $^\circ\text{C}$  and referenced using internal residues:  $\text{CDCl}_3$  ( $\delta_{\text{H}} = 7.26$  ppm,  $\delta_{\text{C}} = 77.16$  ppm),  $\text{CD}_2\text{Cl}_2$  ( $\delta_{\text{H}} = 5.32$  ppm,  $\delta_{\text{C}} = 53.84$  ppm),  $\text{CS}_2$  with  $\text{DMSO-}d_6$  lock tube ( $\delta_{\text{H}} = 2.50$  ppm,  $\delta_{\text{C}} = 39.52$  ppm). Chemical shift values are referenced to the ppm scale; coupling constants are expressed in Hertz (Hz); and apparent multiplicities are reported as s (singlet), d (doublet), t (triplet), dd (doublet of doublets), td (triplet of doublets), or m (multiplet). High-resolution mass spectra (HRMS) were recorded using an Agilent 6210 time-of-flight (TOF) LCMS apparatus equipped with an ESI and APPI ion source (Agilent Technologies, Toronto, Canada) or on a Bruker Solarix XR MALDI-FT-ICR instrument with dithranol as a matrix.

## UV-Vis Absorption Spectroscopy

UV-Vis absorption spectra were recorded on a Varian Cary 50 UV-Vis spectrophotometer between 200 and 800 nm. All spectra were recorded in HPLC grade  $\text{CH}_2\text{Cl}_2$  at room temperature and carried out in a 10 mm quartz cuvettes. Baseline corrections were performed with a blank sample.

## Electrochemistry

Cyclic voltammograms (CV) and differential pulse voltammograms (DPV) were performed using an Autolab PGSTAT12 instrument and Nova 1.11 software. A Pt disk electrode (1.6 mm) was used as the working electrode, a Pt wire as the counter electrode, and a Ag wire (isolated by a ceramic frit) as the reference electrode. Measured potentials were referenced to the ferrocene/ferrocenium ( $\text{Fc}/\text{Fc}^+$ ) redox couple, measured before and after the experiment for a 1.0 mM solution of Fc. All measurements were carried out using a 0.1 M  $n\text{-Bu}_4\text{NPF}_6$  solution in HPLC grade  $\text{CH}_2\text{Cl}_2$  as supporting electrolyte at room temperature with a 0.1 V/s scan rate for CVs. All compounds were measured at 0.50 mM concentrations.

## Synthetic Protocols

### Compound 1

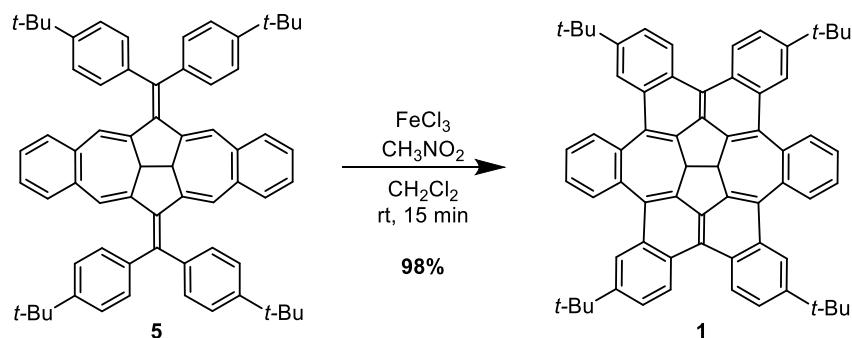

To a flame-dried flask were added FeCl<sub>3</sub> (564 mg, 3.49 mmol) in CH<sub>3</sub>NO<sub>2</sub> (2.10 mL, 38.4 mmol). To a second flame-dried flask was added compound 5 (300 mg, 0.349 mmol) in anh. CH<sub>2</sub>Cl<sub>2</sub> (30 mL). The FeCl<sub>3</sub> solution was added to the second flask under vigorous stirring, and a color change from red to blue was observed. The reaction mixture was stirred for 15 min before it was quenched with anh. MeOH (15 mL), and the reaction mixture was stirred for 5 min. Zn powder (114 mg, 1.75 mmol) was added and the reaction was filtered, and the filtrate was concentrated *in vacuo*. The residue was purified by flash column chromatography (SiO<sub>2</sub>, 20 – 30% CH<sub>2</sub>Cl<sub>2</sub>/*n*-hexane), which yielded compound 1 (294 mg, 0.342 mmol, 98%) as a white solid. <sup>1</sup>H NMR (500 MHz, CDCl<sub>3</sub>) δ 9.14 (d, *J* = 8.9 Hz, 4H), 8.60 (d, *J* = 2.1 Hz, 4H), 8.34 (dd, *J* = 5.8, 3.4 Hz, 4H), 7.69 (dd, *J* = 5.8, 3.4 Hz, 4H), 7.67 (dd, *J* = 8.2, 2.1 Hz, 4H) 5.09 (s, 2H), 1.41 (s, 36H) ppm. <sup>13</sup>C NMR (126 MHz, CDCl<sub>3</sub>) δ 148.25, 147.97, 137.62, 133.51, 132.51, 131.08, 128.91, 127.87, 127.03, 126.13, 124.73, 123.45, 122.71, 50.45, 35.13, 31.48 ppm. HRMS (APPI<sup>+</sup>): *m/z* = 868.4916 [M + NH<sub>4</sub>]<sup>+</sup>, calcd. for [C<sub>66</sub>H<sub>62</sub>N<sup>+</sup>] *m/z* = 868.4877.

### Compound 2

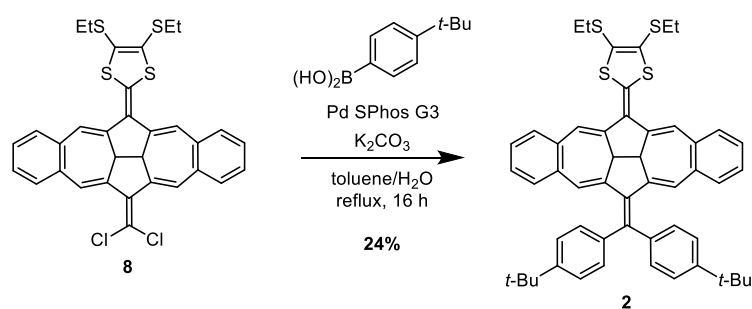

To a solution of compound 6.10 (150 mg, 0.250 mmol) and (4-(*tert*-butyl)phenyl)boronic acid (170 mg, 0.960 mmol) in toluene (20 mL) was added Pd SPhos G3 (40.0 mg, 20 mol%). The solution was degassed for 20 min before degassed aq. K<sub>2</sub>CO<sub>3</sub> (1 M, 1.00 mL, 1.00 mmol) was added, and the reaction mixture was heated to reflux for 16 h. The reaction mixture was cooled to room temperature and diluted with H<sub>2</sub>O (20 mL). The aqueous phase was extracted with CH<sub>2</sub>Cl<sub>2</sub> (3 × 20 mL), and the combined organic phase was dried over MgSO<sub>4</sub> and concentrated *in vacuo*. The product was purified

by repeated flash column chromatography (SiO<sub>2</sub>, 20 – 30% CH<sub>2</sub>Cl<sub>2</sub>/*n*-heptane, 10% CH<sub>2</sub>Cl<sub>2</sub>/*n*-heptane, 20% CHCl<sub>3</sub>/*n*-heptane), followed by repeated recrystallization from CH<sub>2</sub>Cl<sub>2</sub>/*n*-heptane, CH<sub>2</sub>Cl<sub>2</sub>/MeOH and *n*-heptane (three consecutive times). This afforded compound **2** (48.0 mg, 60.0 μmol) in 24% as an orange micro-crystalline solid. <sup>1</sup>H NMR (500 MHz, CS<sub>2</sub> with DMSO-*d*<sub>6</sub> lock tube) δ 7.03 (d, *J* = 7.7 Hz, 2H), 7.20 – 6.76 (m, 8H), 6.83 (t, *J* = 7.7 Hz, 2H), 6.72 (t, *J* = 7.8 Hz, 2H), 6.42 (d, *J* = 7.8, 1.5 Hz, 2H), 6.28 (s, 2H), 5.67 (s, 2H), 2.75 – 2.62 (m, 4H), 2.68 (s, 2H), 1.13 (td, *J* = 7.2, 1.4 Hz, 6H), 1.11 (s, 18H) ppm. <sup>13</sup>C NMR (126 MHz, CS<sub>2</sub> with DMSO-*d*<sub>6</sub> lock tube) δ 149.34, 144.91, 143.92, 140.90, 140.39, 136.41, 136.34, 133.43, 132.75, 130.66, 130.37, 128.53, 128.45, 125.04, 125.00, 124.54, 124.18, 122.06, 122.04, 47.43, 33.62, 30.88, 30.74, 14.78 ppm. HRMS (MALDI<sup>+</sup> FT-ICR, dithranol): *m/z* = 802.2796 [M]<sup>+</sup>, calcd. for [C<sub>52</sub>H<sub>50</sub>S<sub>4</sub>]<sup>+</sup> *m/z* = 802.2790.

### Compound **2b**

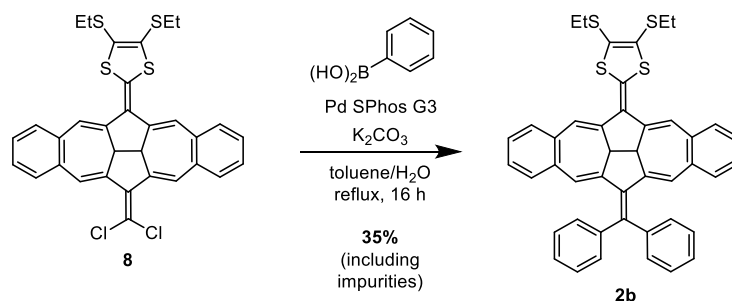

To a solution of compound **6.10** (150 mg, 0.250 mmol) and phenylboronic acid (120 mg, 0.990 mmol) in toluene (20 mL) was added Pd SPhos G3 (40.0 mg, 20 mol%). The solution was degassed for 20 min before degassed aq. K<sub>2</sub>CO<sub>3</sub> (1 M, 1.00 mL, 1.00 mmol) was added, and the reaction mixture was heated to reflux for 16 h. The reaction mixture was cooled to room temperature and diluted with H<sub>2</sub>O (20 mL). The aqueous phase was extracted with CH<sub>2</sub>Cl<sub>2</sub> (3 × 20 mL), and the combined organic phase was dried over MgSO<sub>4</sub> and concentrated *in vacuo*. The product was purified by repeated flash column chromatography (SiO<sub>2</sub>, 40% CH<sub>2</sub>Cl<sub>2</sub>/*n*-heptane, 20 – 40% CH<sub>2</sub>Cl<sub>2</sub>/*n*-heptane, 20% CHCl<sub>3</sub>/*n*-heptane), followed by repeated recrystallization from CH<sub>2</sub>Cl<sub>2</sub>/*n*-heptane, *n*-heptane (two consecutive times), and CH<sub>2</sub>Cl<sub>2</sub>/MeOH. This afforded compound **6.2b** (60.0 mg, 60.0 μmol) in 35% as red crystals; however, the material still contained impurities. <sup>1</sup>H NMR (500 MHz, DMSO-*d*<sub>6</sub>) δ 7.17 – 6.99 (m, 12H), 6.85 (t, *J* = 7.4 Hz, 2H), 6.74 (t, *J* = 7.5 Hz, 2H), 6.48 (d, *J* = 7.9 Hz, 2H), 6.29 (s, 2H), 5.72 (s, 2H), 2.76 – 2.60 (m, 4H), 2.70 (s, 2H), 1.14 (td, *J* = 7.4, 2.0 Hz, 7H) ppm. <sup>13</sup>C NMR (126 MHz, DMSO-*d*<sub>6</sub>) δ 144.63, 143.95, 143.15, 140.41, 136.45, 136.13, 133.47, 132.97, 130.93, 130.34, 129.23, 128.58, 128.48, 127.90, 126.77, 125.18, 124.65, 124.54, 122.05, 47.42, 30.76, 14.78 ppm. HRMS (MALDI<sup>+</sup> FT-ICR, dithranol): *m/z* = 690.1543 [M]<sup>+</sup>, calcd. for [C<sub>44</sub>H<sub>34</sub>S<sub>4</sub>]<sup>+</sup> *m/z* = 690.1538.

## Compound 4

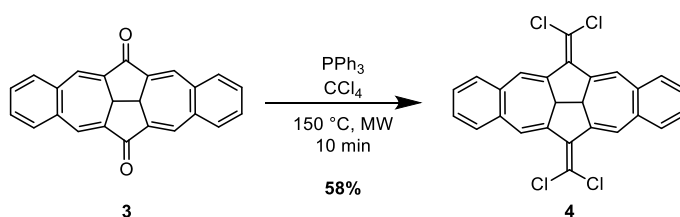

To a flame-dried MW vial were added compound **3**<sup>1</sup> (300 mg, 0.897 mmol), PPh<sub>3</sub> (1.88 g, 7.18 mmol) and CCl<sub>4</sub> (7.00 mL, 72.3 mmol), and the suspension was degassed for 30 min. The microwave vial was sealed, and the reaction mixture was heated in a microwave to 150 °C for 10 min. The reaction mixture was filtered through a pad of SiO<sub>2</sub> eluting with CH<sub>2</sub>Cl<sub>2</sub> and concentrated *in vacuo*. The product was purified by flash column chromatography (SiO<sub>2</sub>, 25 – 90% CHCl<sub>3</sub>/*n*-hexanes), which yielded compound **4** (242 mg, 0.516 mmol, 58%) as a yellow solid. <sup>1</sup>H NMR (500 MHz, CDCl<sub>3</sub>) δ 7.81 (s, 4H), 7.49 (dd, *J* = 5.9, 3.4 Hz, 4H), 7.33 (dd, *J* = 5.9, 3.4 Hz, 4H), 2.98 – 2.89 (m, 2H) ppm. <sup>13</sup>C NMR (126 MHz, CDCl<sub>3</sub>) δ 143.15, 137.43, 132.41, 131.68, 127.92, 126.75, 120.91, 47.39 ppm. HRMS (LCMS APPI<sup>+</sup>): *m/z* = 468.9918 [M + H]<sup>+</sup>, calcd. for [C<sub>26</sub>H<sub>14</sub>Cl<sub>4</sub><sup>+</sup>] *m/z* = 468.9893.

## Compound 5

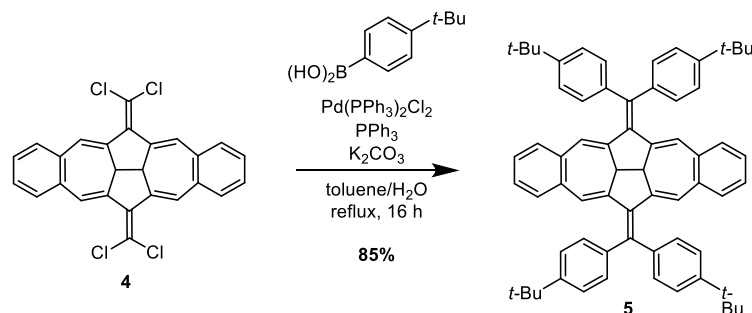

To a solution of compound **4** (396 mg, 0.845 mmol), (4-(*tert*-butyl)phenyl)boronic acid (1.20 g, 6.77 mmol) and PPh<sub>3</sub> (44.0 mg, 0.169 mmol) in toluene (40 mL) were added K<sub>2</sub>CO<sub>3</sub> (935 mg, 6.77 mmol) and H<sub>2</sub>O (10 mL). The solution was degassed for 20 min before Pd(PPh<sub>3</sub>)<sub>2</sub>Cl<sub>2</sub> (119 mg, 0.169 mmol) was added, and the solution was further degassed for 10 min. The reaction mixture was heated to reflux for 16 h, before it was cooled to room temperature and diluted with H<sub>2</sub>O (100 mL). The aqueous phase was extracted with CH<sub>2</sub>Cl<sub>2</sub> (3 × 50 mL), and the combined organic phase was dried over MgSO<sub>4</sub> and concentrated *in vacuo*. The reaction was purified by flash column chromatography (SiO<sub>2</sub>, 20 – 40% CH<sub>2</sub>Cl<sub>2</sub>/*n*-hexanes), which yielded compound **5** (625 mg, 0.727 mmol, 85%). <sup>1</sup>H NMR (500 MHz, CDCl<sub>3</sub>) δ 7.40 (d, *J* = 7.5 Hz, 8H), 7.30 (d, *J* = 7.5 Hz, 8H), 6.98 (dd, *J* = 5.9, 3.4 Hz, 4H), 6.66 (dd, *J* = 5.9, 3.4 Hz, 4H), 5.98 (s, 4H), 3.08 (s, 2H), 1.34 (s, 36H) ppm. <sup>13</sup>C NMR (126 MHz, CDCl<sub>3</sub>) δ 150.55, 146.41, 142.08, 141.54, 137.00, 134.93, 130.84, 128.75, 126.04, 125.37, 124.97, 47.44, 34.79, 31.55 ppm. HRMS (ESI<sup>+</sup>): *m/z* = 859.5059 [M + H]<sup>+</sup>, calcd. for [C<sub>66</sub>H<sub>67</sub><sup>+</sup>] *m/z* = 859.5238.

## Compound 7

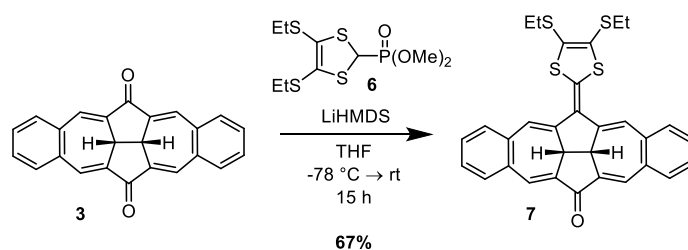

Synthesized according to a modified literature procedure.<sup>2</sup> To a flame-dried Schlenk flask under a positive flow of N<sub>2</sub> was added phosphonate-ester **6**<sup>3</sup> (795 mg, 2.40 mmol) in anh. THF (18 mL). The solution was degassed and cooled to -78 °C in a dry ice/acetone bath for 30 min. LiHMDS (1 M in toluene, 2.90 mL, 2.90 mmol) was added dropwise, and the reaction mixture was stirred at -78 °C for 1 h. In a separate flame-dried Schlenk flask was added compound **3** (800 mg, 2.40 mmol) in anh. THF (35 mL). The solution was degassed and cooled to -78 °C in a dry ice/acetone bath for 30 min before the solution containing deprotonated **6** was added fast via cannulation. The reaction mixture was stirred for 15 h while slowly reaching rt. The reaction was quenched with aqueous NH<sub>4</sub>Cl (sat., 20 mL), washed with H<sub>2</sub>O (30 mL) and extracted with CH<sub>2</sub>Cl<sub>2</sub> (3 × 40 mL). The combined organic phase was dried over MgSO<sub>4</sub> and concentrated *in vacuo*. The product was purified by flash column chromatography (70 – 100% CH<sub>2</sub>Cl<sub>2</sub>/*n*-heptane) followed by precipitation from MeOH. This yielded compound **7** (870 mg, 1.61 mmol, 67%) as a red solid. <sup>1</sup>H NMR (500 MHz, CD<sub>2</sub>Cl<sub>2</sub>) δ 7.68 – 7.63 (m, 6H), 7.45 (td, *J* = 7.6, 1.5 Hz, 2H), 7.36 (td, *J* = 7.5, 1.3 Hz, 2H), 6.91 (s, 2H), 3.27 – 3.22 (s, 2H), 2.95 (m, 4H), 1.31 (t, *J* = 7.3 Hz, 6H). <sup>13</sup>C NMR (126 MHz, CD<sub>2</sub>Cl<sub>2</sub>) δ 190.39, 144.91, 141.09, 139.29, 137.77, 134.26, 133.21, 132.24, 131.01, 130.17, 128.62, 126.33, 122.63, 121.77, 43.50, 31.38, 15.25. HRMS (MALDI<sup>+</sup> FT-ICR, dithranol): *m/z* = 540.0714 [M]<sup>+</sup>, calcd. for [C<sub>31</sub>H<sub>24</sub>OS<sub>4</sub>]<sup>+</sup> *m/z* = 540.0705.

## Compound 8

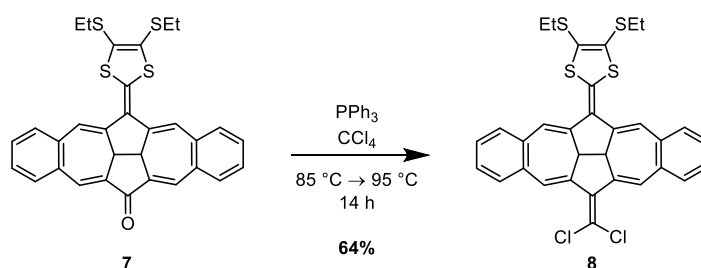

To a flame-dried microwave vial were added compound **7** 50 (409 mg, 0.756 mmol) and PPh<sub>3</sub> (1.54 g, 5.87 mmol) and CCl<sub>4</sub> (6.00 mL, 46.8 mmol), and the suspension was degassed for 30 min. The microwave vial was sealed and the reaction mixture was heated to 80 °C using conventional heating. After 1 h, the temperature was increased to 95 °C, and the reaction mixture was stirred for 14 h before it was cooled to rt. The reaction mixture was filtered through a plug of SiO<sub>2</sub> (CH<sub>2</sub>Cl<sub>2</sub>) and concentrated *in vacuo* to afford compound **8** (294 mg, 0.484 mmol) in 64% yield as a red solid, without further purification needed. <sup>1</sup>H NMR (500 MHz, CD<sub>2</sub>Cl<sub>2</sub>) δ 7.83 (s, 2H), 7.53

– 7.49 (m, 4H), 7.33 (td,  $J = 7.5, 1.6$  Hz, 2H), 7.29 (td,  $J = 7.4, 1.5$  Hz, 2H), 6.75 (s, 2H), 3.04 – 3.00 (m, 2H), 2.99 – 2.86 (m, 4H), 1.31 (t,  $J = 7.3$  Hz, 6H) ppm.  $^{13}\text{C}$  NMR (126 MHz,  $\text{CD}_2\text{Cl}_2$ )  $\delta$  146.03, 142.94, 138.30, 136.76, 135.35, 133.25, 132.10, 131.47, 129.70, 128.15, 126.94, 125.90, 122.29, 121.48, 120.13, 48.43, 31.31, 15.30 ppm. HRMS (MALDI<sup>+</sup> FT-ICR, dithranol):  $m/z = 606.0141$   $[\text{M}]^+$ , calcd. for  $[\text{C}_{32}\text{H}_{24}\text{Cl}_2\text{S}_4]^{++}$   $m/z = 606.0133$ .

## NMR Spectra

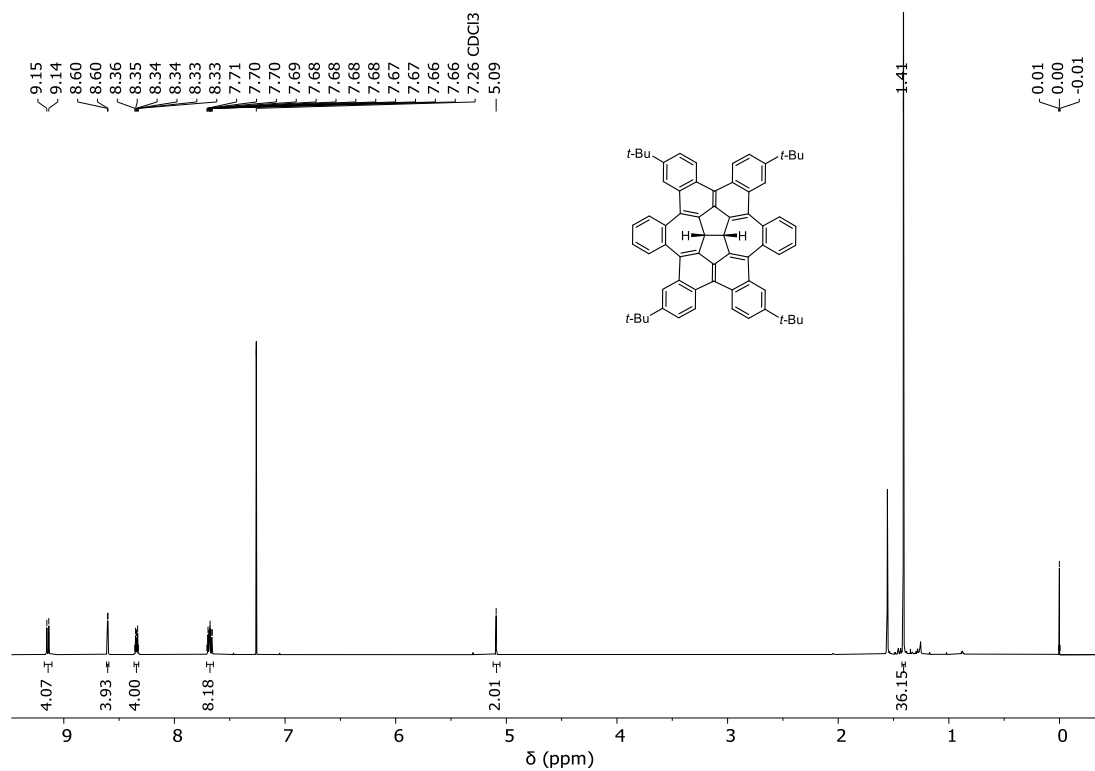

**Fig. S1**  $^1\text{H}$  NMR (500 MHz) spectrum of compound **1** in  $\text{CDCl}_3$ .

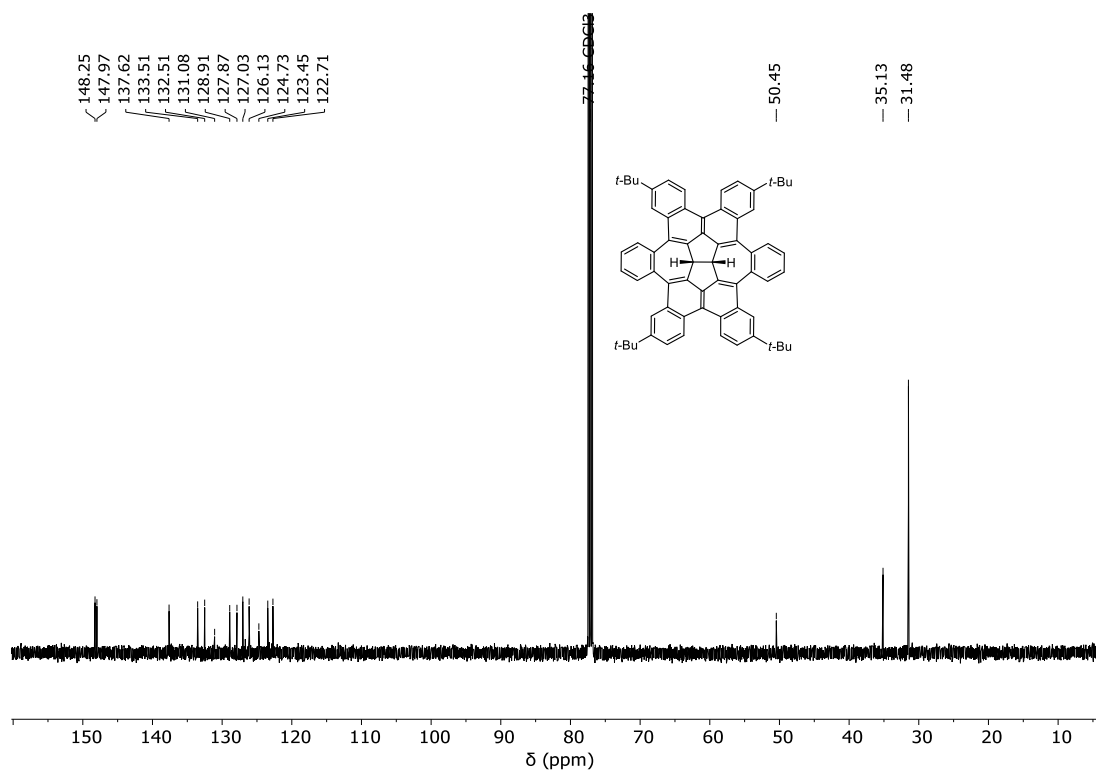

**Fig. S2** <sup>13</sup>C NMR (126 MHz) spectrum of compound **1** in CDCl<sub>3</sub>.

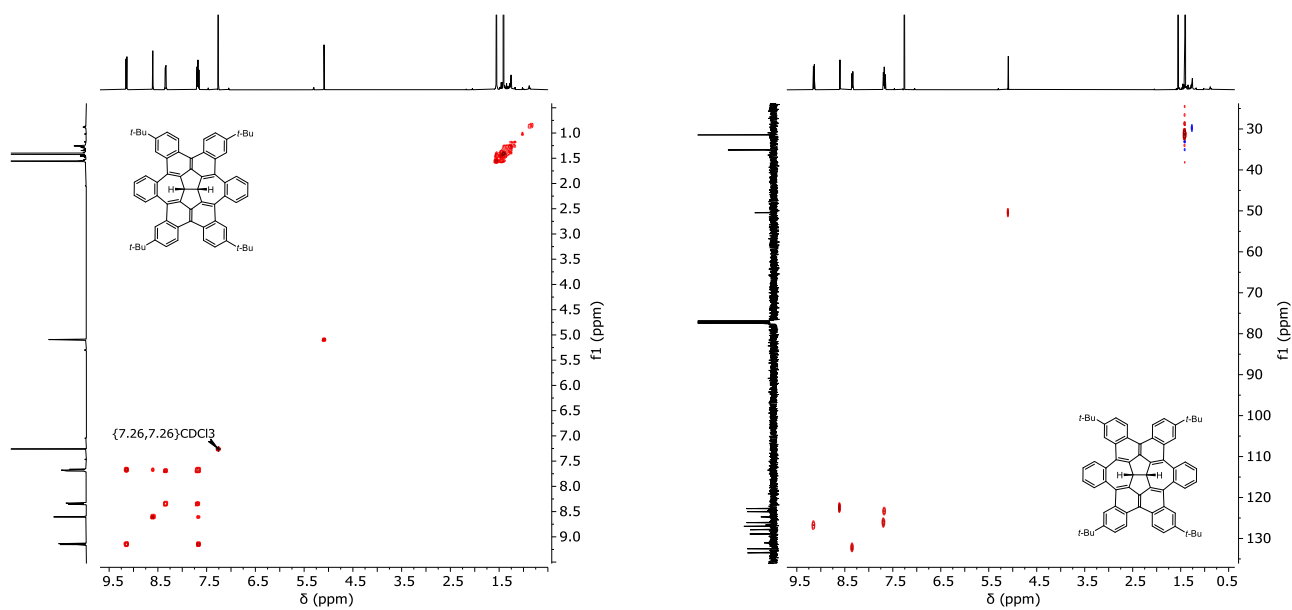

**Fig. S3** Left: <sup>1</sup>H-<sup>1</sup>H COSY NMR (500 MHz) of compound **1** in CDCl<sub>3</sub>. Right: <sup>1</sup>H-<sup>13</sup>C HSQC NMR (500/126 MHz) of compound **1** in CDCl<sub>3</sub>.

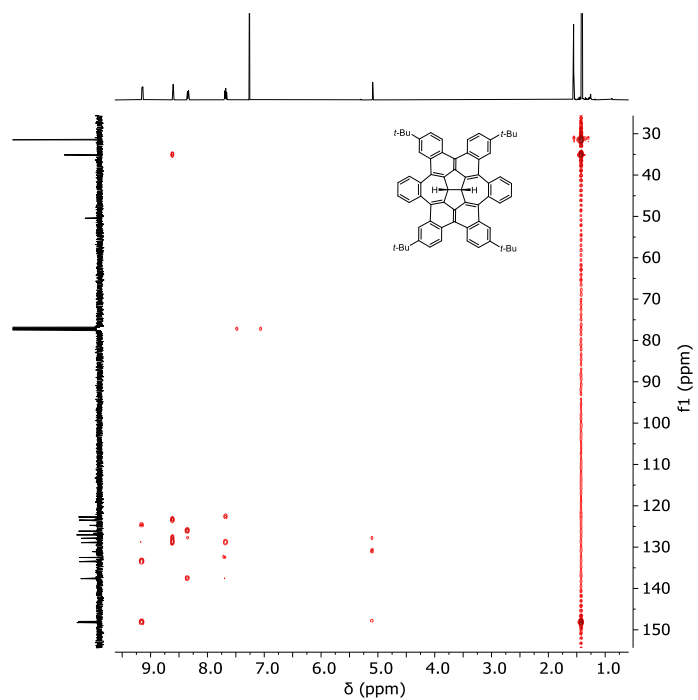

Fig. S4  $^1\text{H}$ - $^{13}\text{C}$  HMBC NMR (500/126 MHz) of compound **6.1** in  $\text{CDCl}_3$ .

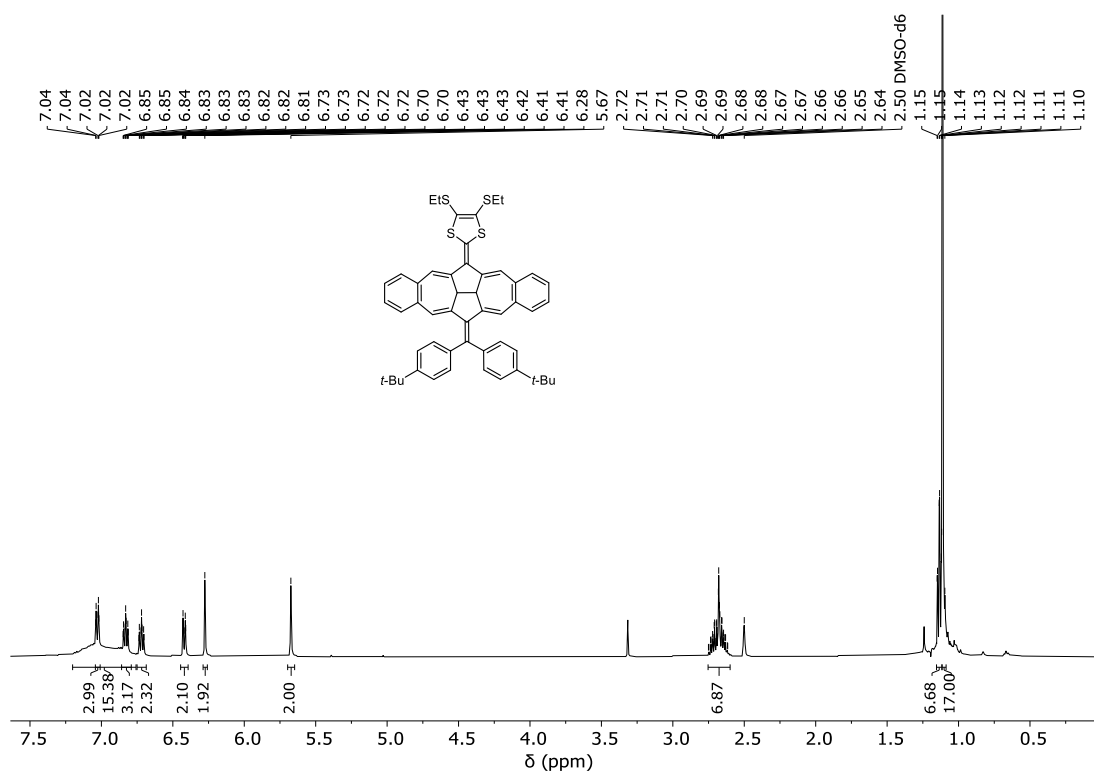

Fig. S5  $^1\text{H}$  NMR (500 MHz) spectrum of compound **2** in  $\text{CS}_2$  with DMSO- $d_6$  lock tube.

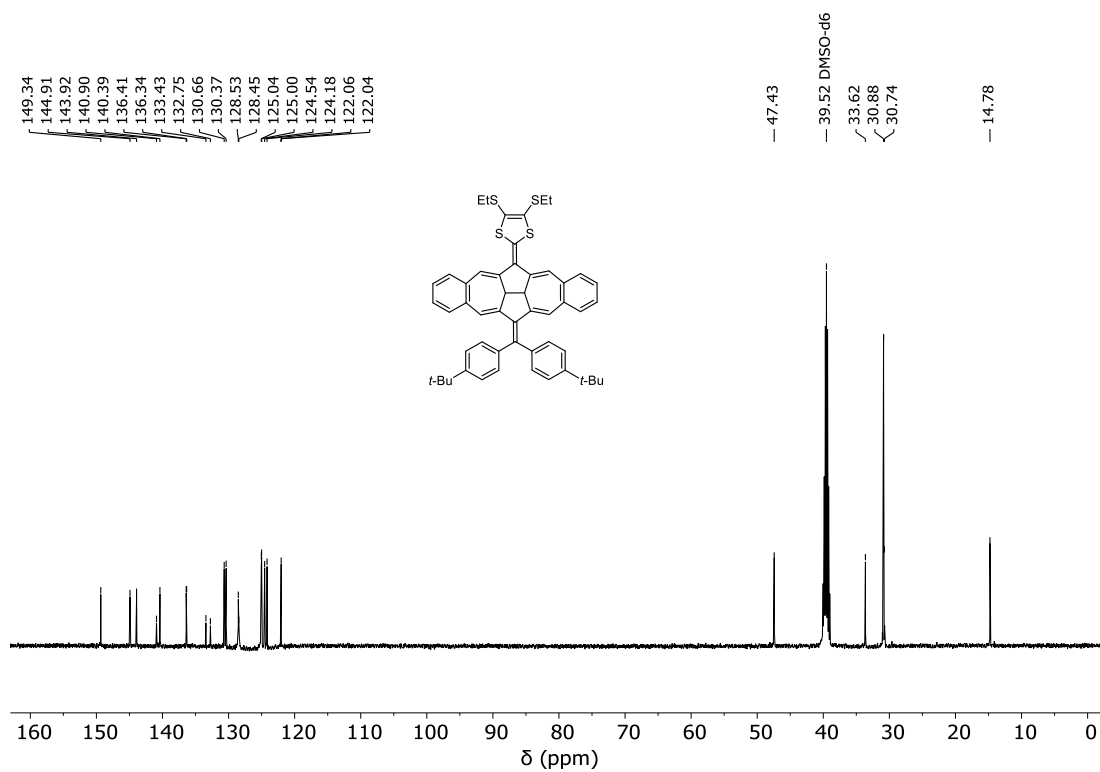

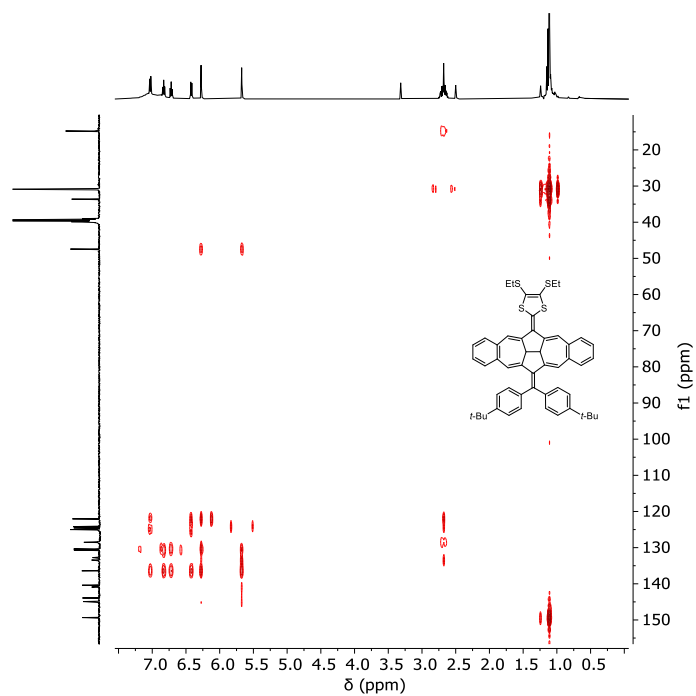

**Fig. S8**  $^1\text{H}$ - $^{13}\text{C}$  HMBC NMR (500/126 MHz) of compound **2** in  $\text{CS}_2$  with  $\text{DMSO-}d_6$  lock tube.

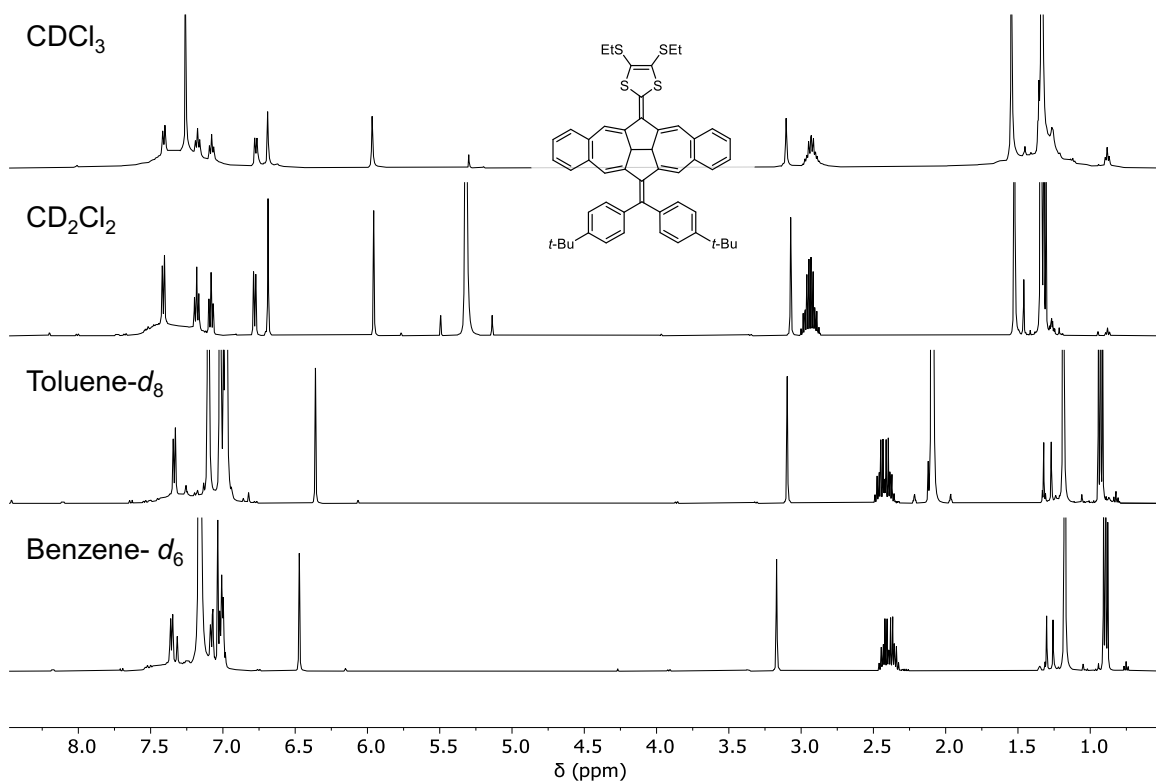

**Fig. S9**  $^1\text{H}$  NMR (500 MHz) spectra of compound **2** in different solvents (from the top):  $\text{CDCl}_3$ ,  $\text{CD}_2\text{Cl}_2$ , toluene- $d_8$ , and benzene- $d_6$ .

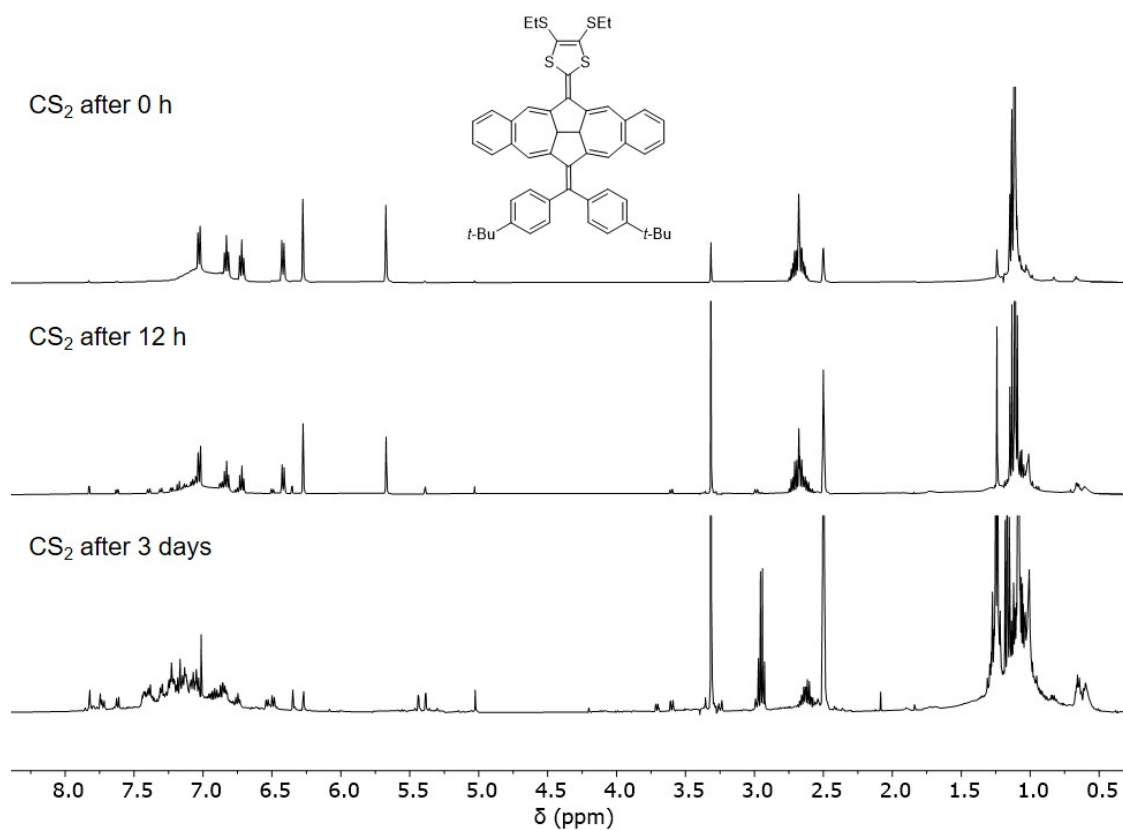

**Fig. S10** <sup>1</sup>H NMR spectra of compound **2** recorded in CS<sub>2</sub> (with DMSO-*d*<sub>6</sub> lock tube) right after preparing the sample (top), after 12 h (middle), and after 3 days (bottom) at 25 °C.

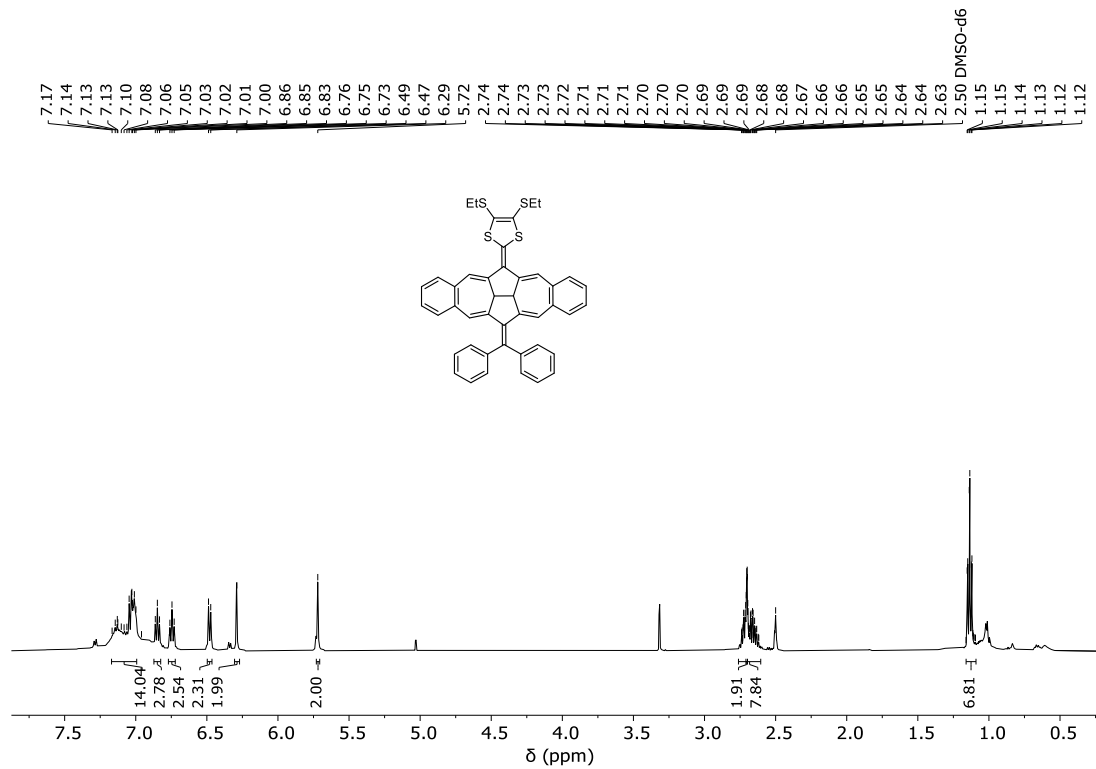

**Fig. S11** <sup>1</sup>H NMR (500 MHz) spectrum of compound **2b** including impurities in CS<sub>2</sub> with DMSO-*d*<sub>6</sub> lock tube.

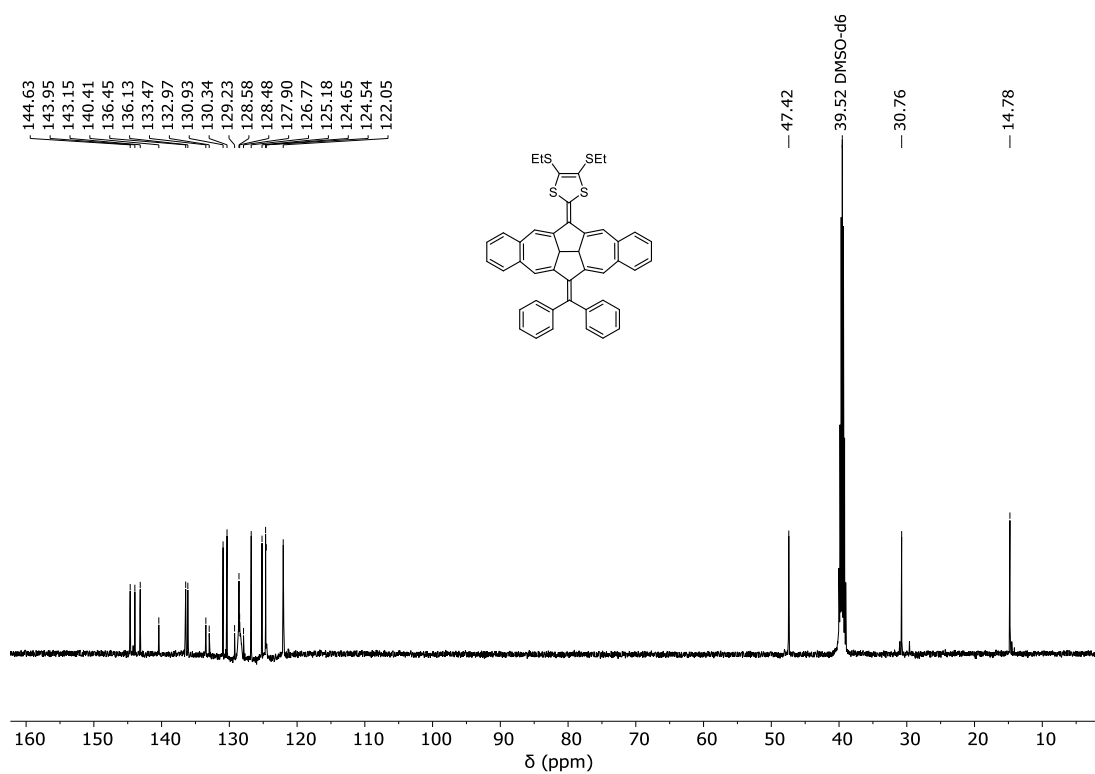

**Fig. S12** <sup>13</sup>C NMR (126 MHz) spectrum of compound **2b** including impurities in CS<sub>2</sub> with DMSO-*d*<sub>6</sub> lock tube.

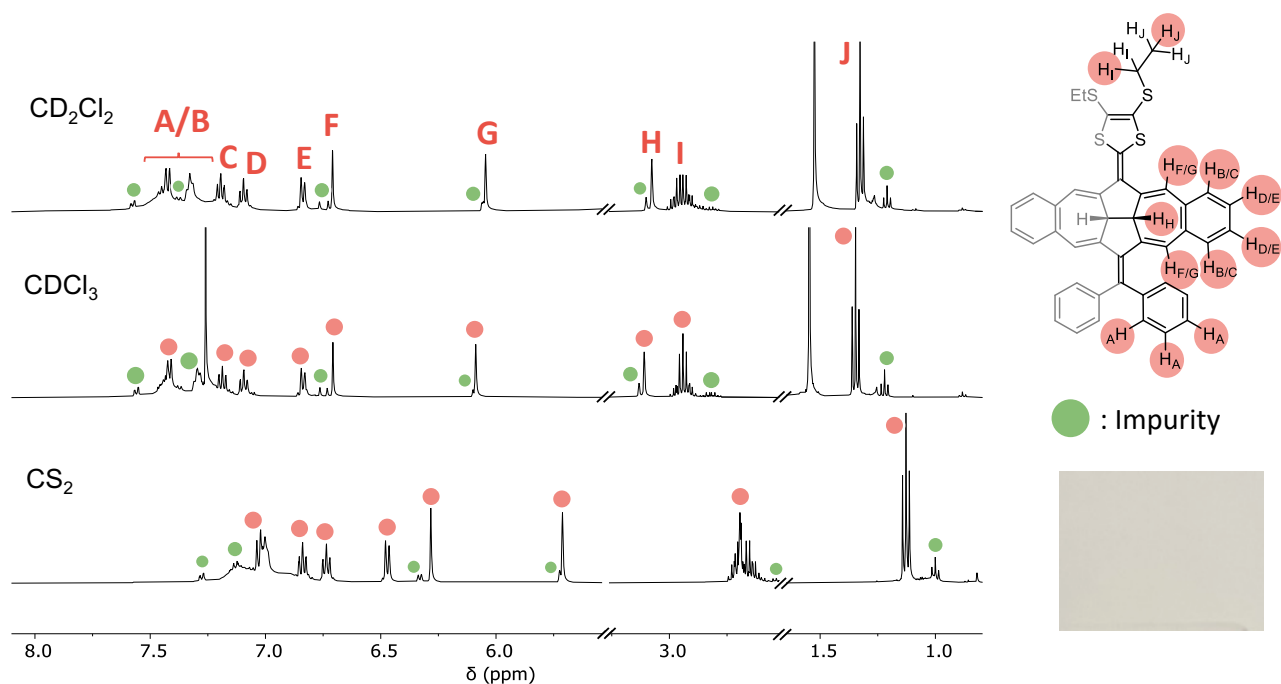

**Fig S13** <sup>1</sup>H NMR spectra of compound **2b** including impurities, recorded in CD<sub>2</sub>Cl<sub>2</sub> (top), CDCl<sub>3</sub> (middle), and CS<sub>2</sub> (with DMSO-*d*<sub>6</sub> lock tube, bottom) at 25 °C. Insert: photograph of isolated crystalline material.

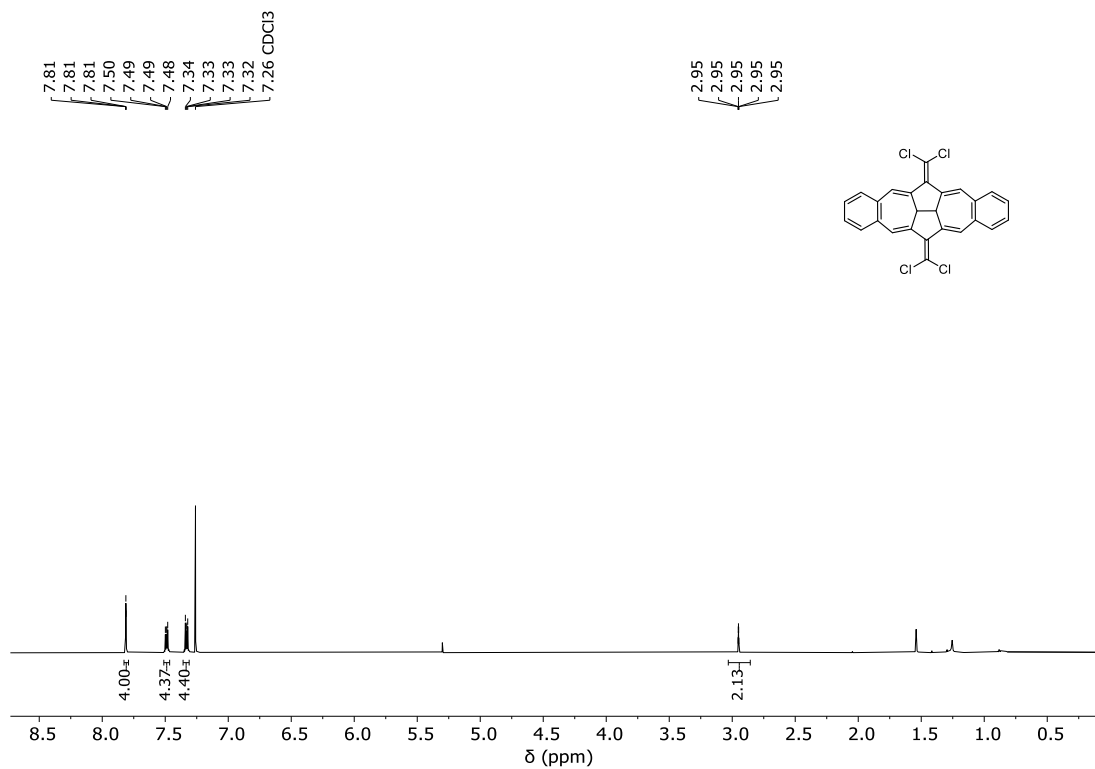

**Fig. S14** <sup>1</sup>H NMR (500 MHz) spectrum of compound 4 in CDCl<sub>3</sub>.

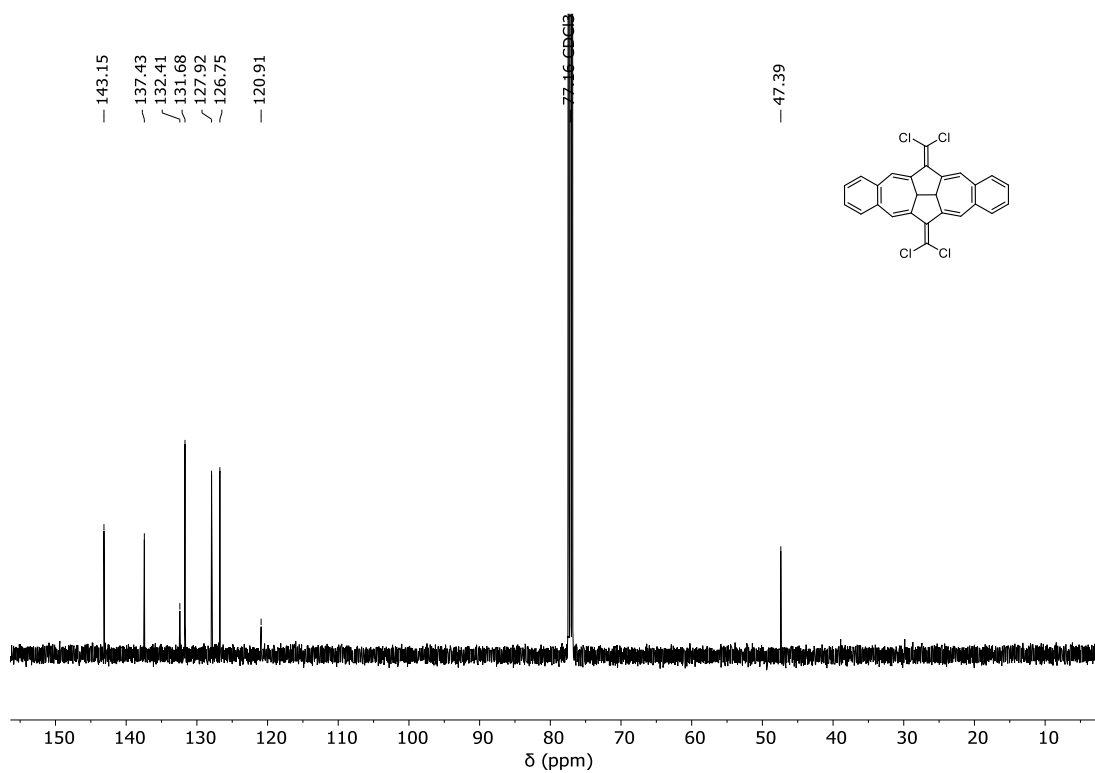

**Fig. S15** <sup>13</sup>C NMR (126 MHz) spectrum of compound 4 in CDCl<sub>3</sub>.

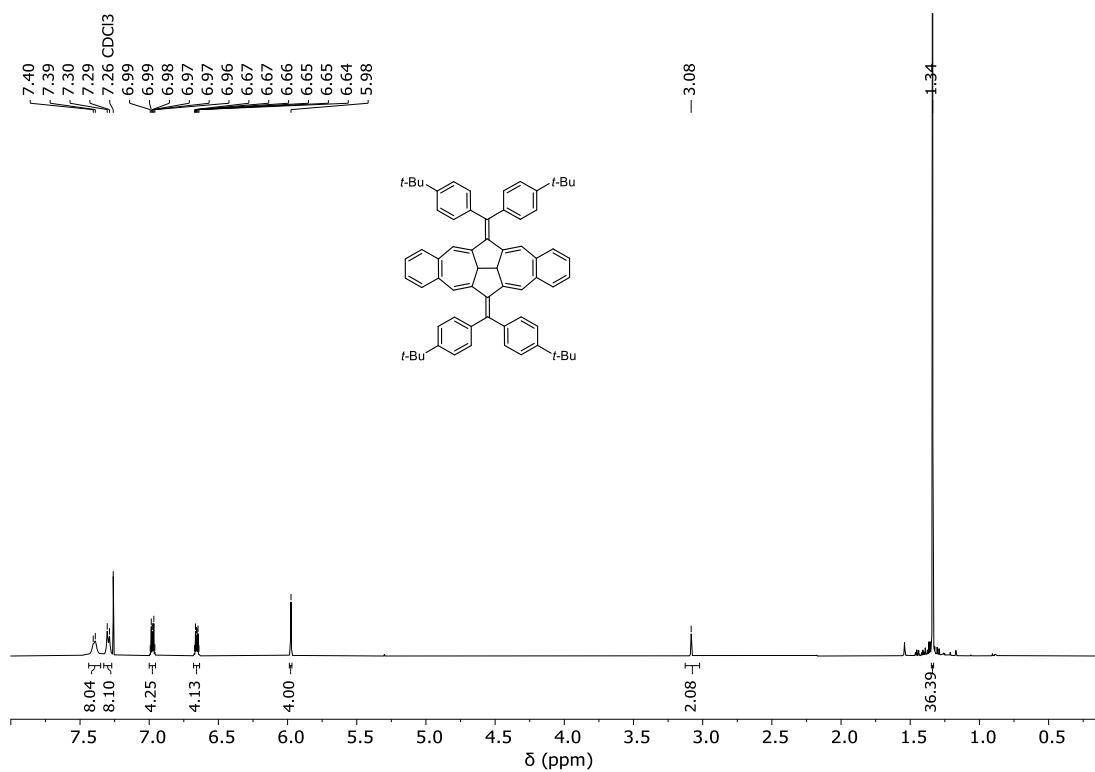

**Fig. S16** <sup>1</sup>H NMR (500 MHz) spectrum of compound **5** in CDCl<sub>3</sub>.

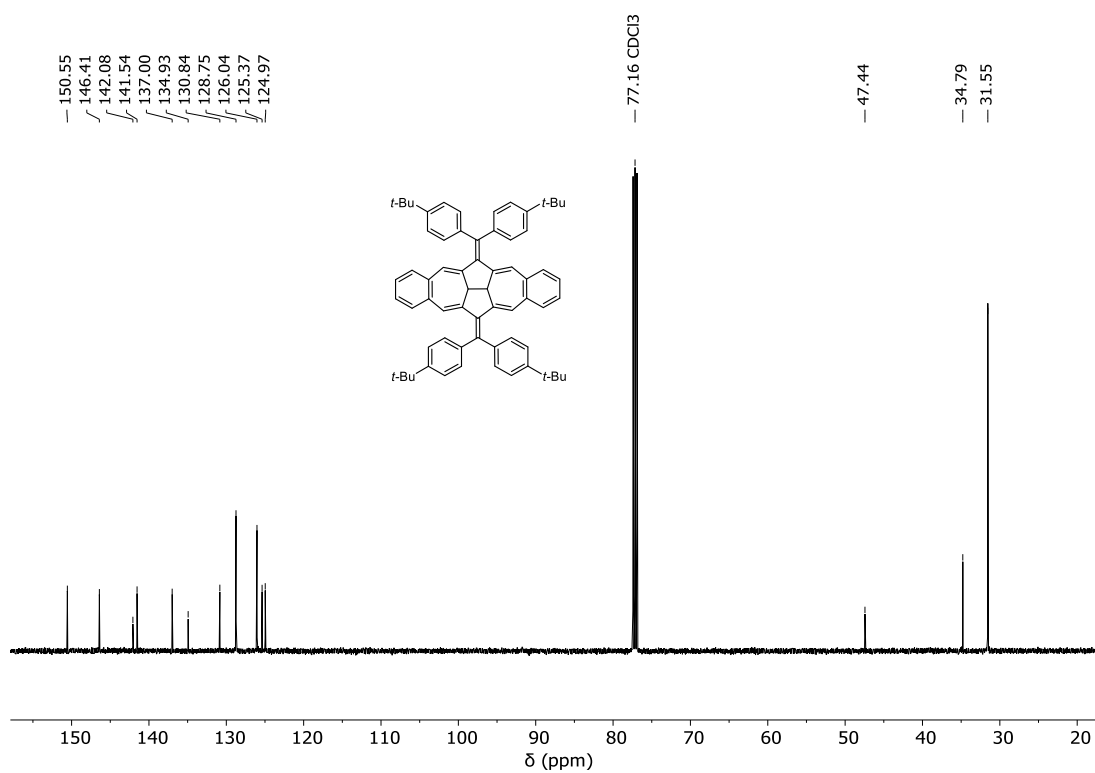

**Fig. S17** <sup>13</sup>C NMR (126 MHz) spectrum of compound **5** in CDCl<sub>3</sub>.

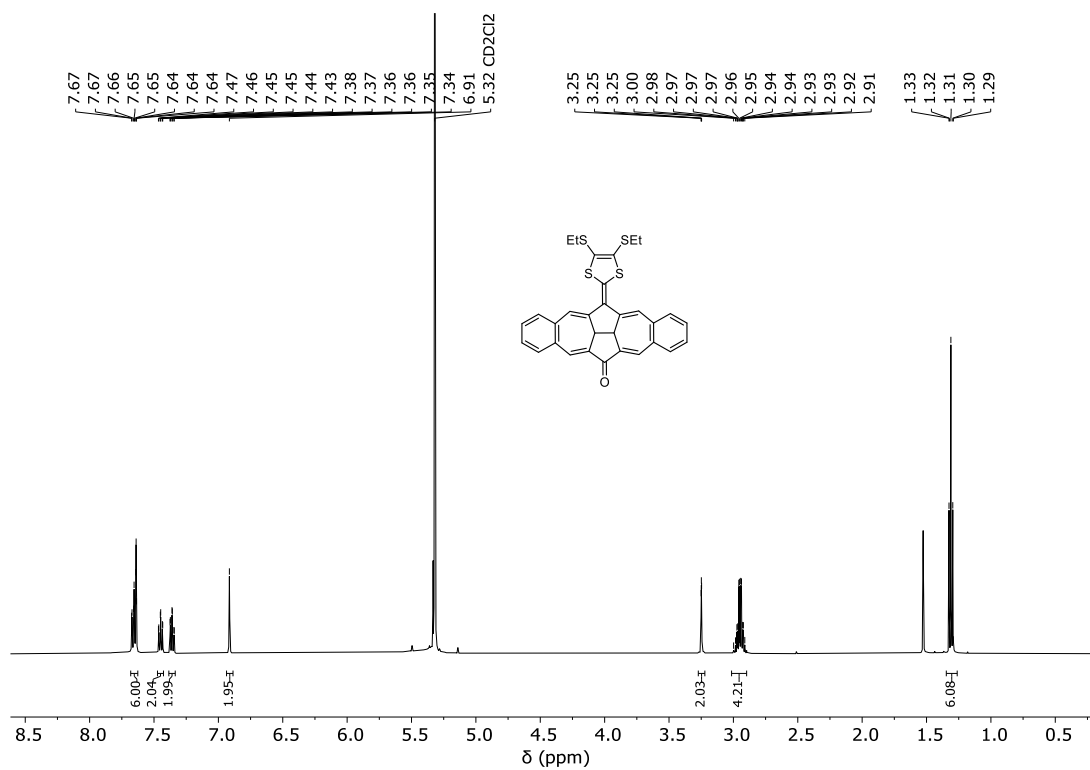

Fig. S18  $^1\text{H}$  NMR (500 MHz) spectrum of compound 7 in  $\text{CD}_2\text{Cl}_2$

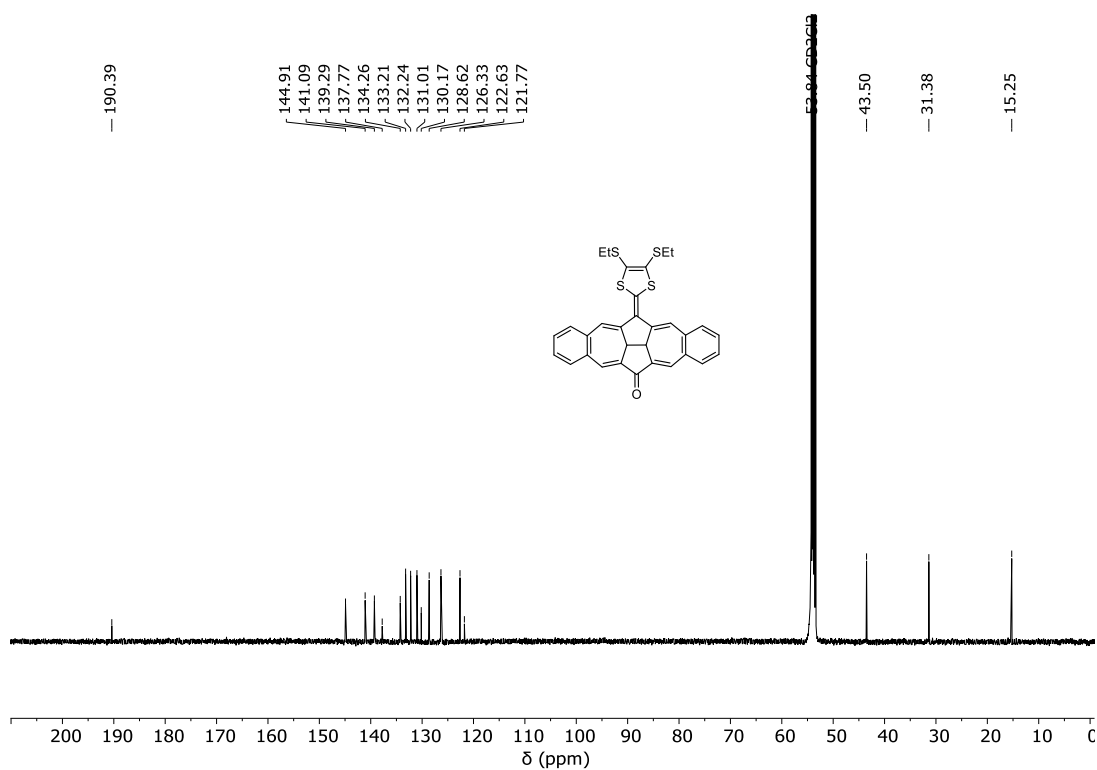

Fig. S19  $^{13}\text{C}$  NMR (126 MHz) spectrum of compound 7 in  $\text{CD}_2\text{Cl}_2$ .

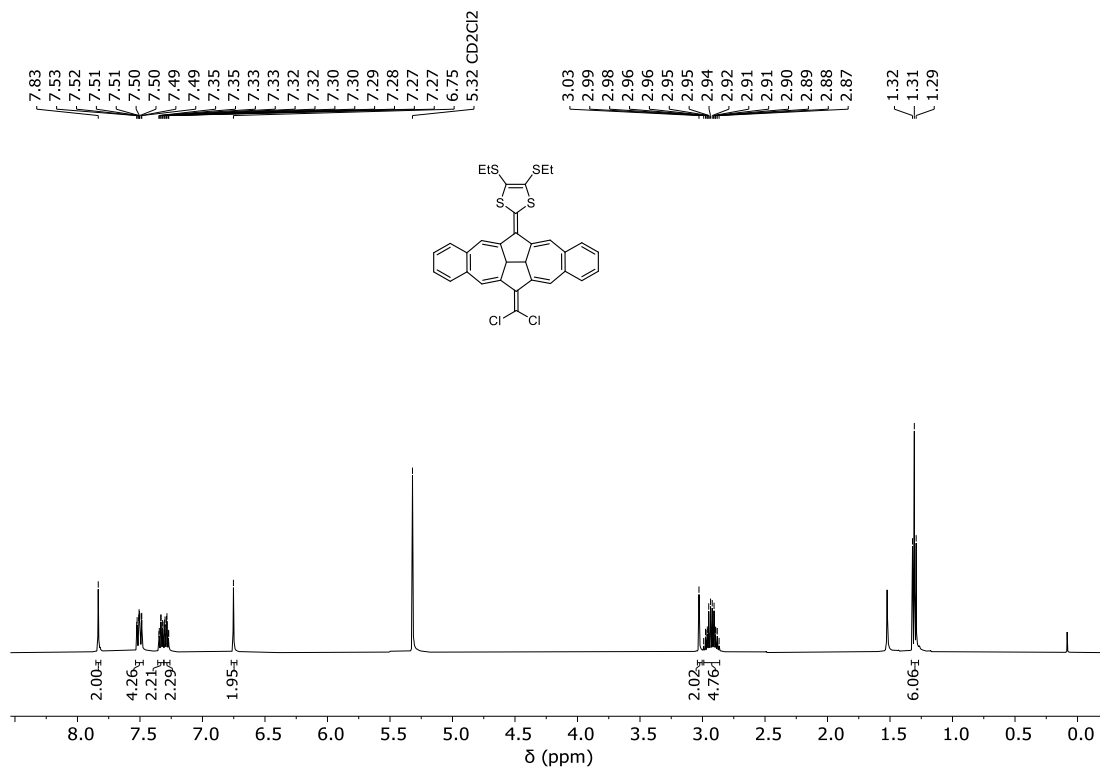

Fig. S20 <sup>1</sup>H NMR (500 MHz) spectrum of compound **8** in CD<sub>2</sub>Cl<sub>2</sub>.

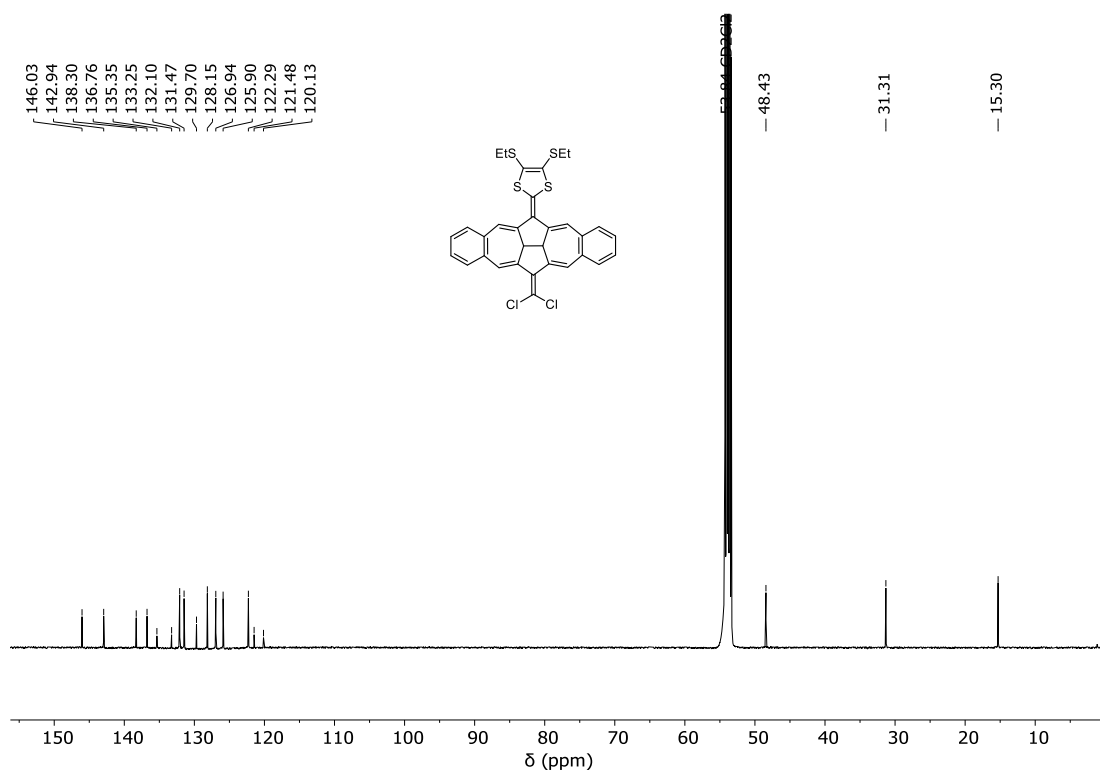

Fig. S21 <sup>13</sup>C NMR (126 MHz) spectrum of compound **8** in CDCl<sub>3</sub>.

## UV–Vis Absorption Spectroscopy Data

**Table S1.** Absorption maxima and extinction coefficients for compounds **1**, **5**, **2**, and **7** in CH<sub>2</sub>Cl<sub>2</sub>, at room temperature

| Compound | $\lambda_{\max}$ (nm), ( $\epsilon / 10^4 \text{ cm}^{-1} \cdot \text{M}^{-1}$ )                      |
|----------|-------------------------------------------------------------------------------------------------------|
| <b>1</b> | 397 (1.1), 375 (0.9), 355 (2.7), 340 (4.0), 302 (12.3), 293 (12.2), 253 ( <i>sh</i> , 6.6), 244 (7.0) |
| <b>5</b> | 386 (1.6), 276 (7.7)                                                                                  |
| <b>2</b> | 450 (2.8), 379 (1.9), 356 (1.9), 332 ( <i>sh</i> , 2.0), 287 (9.4)                                    |
| <b>7</b> | 545 (0.9), 419 (1.5), 392 ( <i>sh</i> , 1.5), 364 (1.6), 315 (6.9)                                    |

## Electrochemistry Data

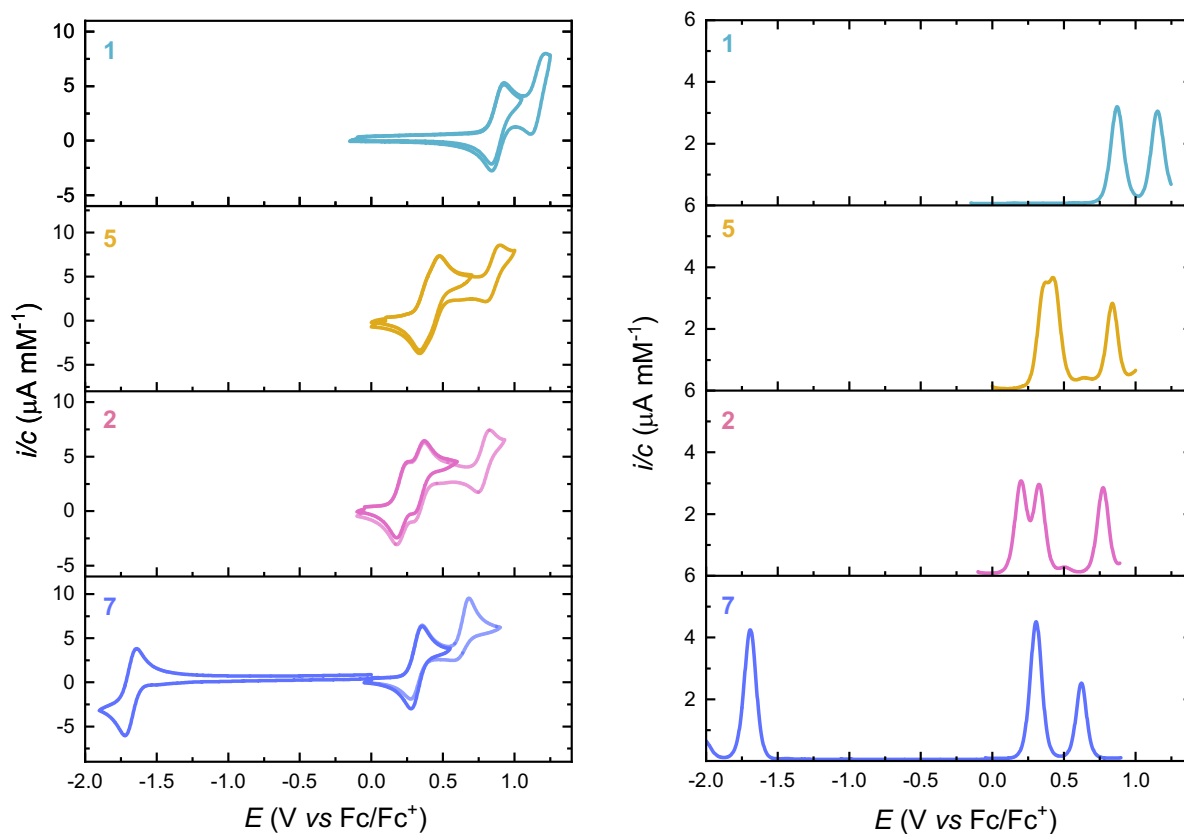

**Fig. S22** Cyclic voltammograms (left) and differential pulse voltammograms (right) of **1** (cyan), **5** (yellow), **2** (pink), and **7** (purple). The experiments were recorded in CH<sub>2</sub>Cl<sub>2</sub> with *n*-Bu<sub>4</sub>NPF<sub>6</sub> (0.1 M) as supporting electrolyte at room temperature, analyte concentrations at 0.5mM and a scan rate of 0.1 V·s<sup>-1</sup>.

## X-Ray Crystallography

### X-Ray crystal data obtained for mo\_d8v7146\_1\_ (compound 2b) including disorder

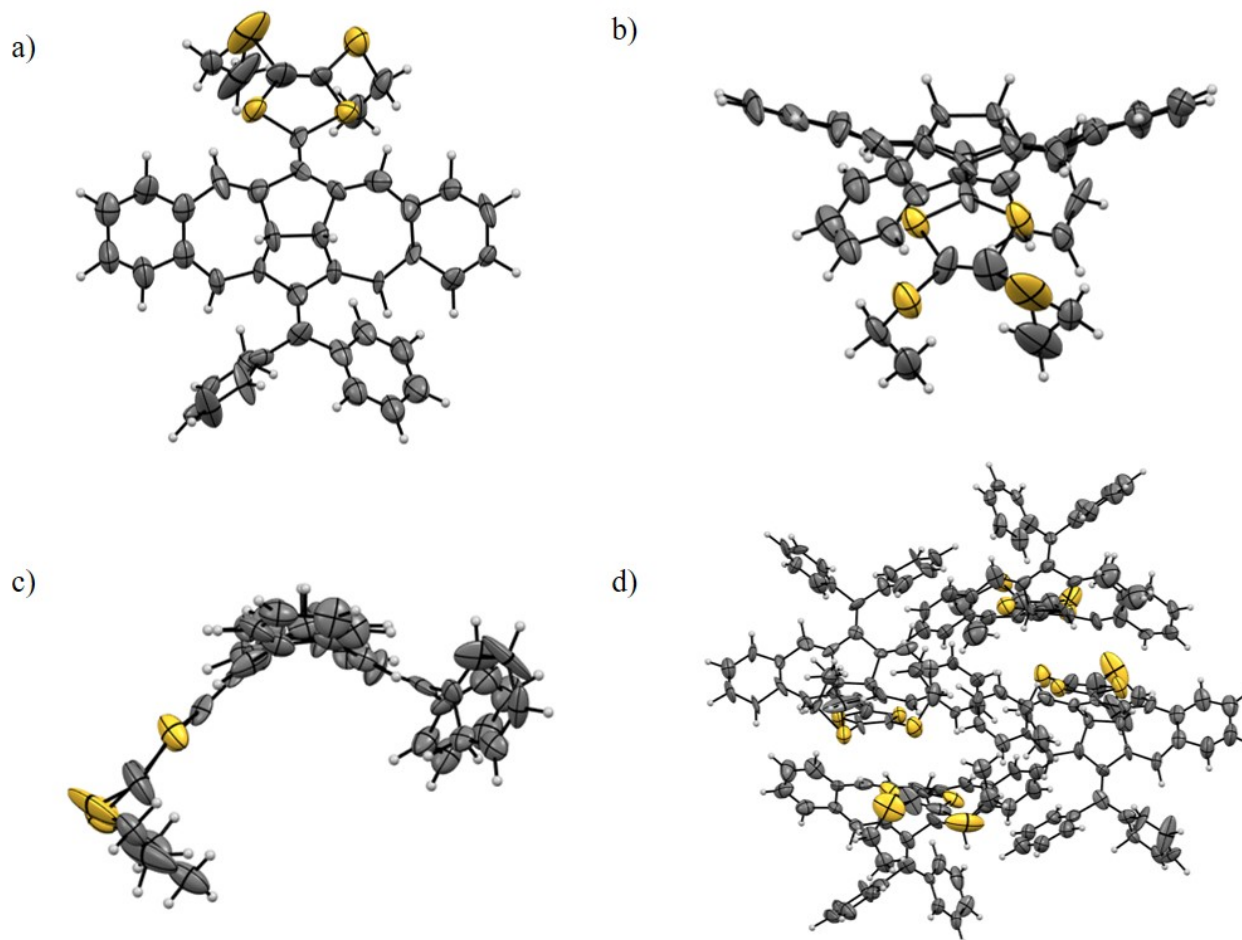

**Fig. S23** Crystal structure obtained for compound **2b** determined by X-ray diffraction data shown as 50% probability thermal ellipsoids. a) Top view, b) front view, c) side view, d) packing. Atoms are colored grey (carbon), yellow (sulfur), and white (hydrogen).

The lack of long-range order, which is persistent across different crystallization protocols for **2b**, would yield diffraction data of poor quality as earlier described. The best diffracting crystals were obtained by recrystallisation from dichloromethane and methanol. A clear orange, block-shaped crystal was mounted on the goniometer. Data for mo\_d8v7146\_1\_a were collected from a shock-cooled single crystal at 100.00 K on a Bruker D8 Venture and a Photon III 28 detector. The diffractometer used MoK $\alpha$  radiation ( $\lambda = 0.71073 \text{ \AA}$ ). All data were integrated with SAINT V8.40B and a multi-scan absorption correction using TWINABS 2012/1 was applied.<sup>4,5</sup> The structure was solved by dual methods with SHELXT 2018/2 and refined by full-matrix least-squares methods against  $F^2$  using SHELXL 2019/3.<sup>6,7</sup> All non-hydrogen atoms were refined with anisotropic displacement parameters. Due to poor data quality. This report was partially generated using FinalCif.<sup>8</sup>

The diffraction data clearly indicated the presence of two domains which were considered during the data reduction via TWINABS 2012/1.<sup>4,5</sup> A suitable model was obtained to confirm the overall connectivity and expected geometry of **2b**, by applying a large number of constraints and restraints. In spite of these, the ADPs are large and, furthermore, the bond lengths and angles are not reliable enough to be reported. During the modeling the dispersed  $F_{\text{obs}}$  vs  $F_{\text{calc}}$  graph clearly indicated the possibility of other twin domains caused by further merohedral twinning within the two domains. Upon adding the merohedral twin law to the model, the  $R$ -factor was reduced further. This clearly indicates the lack of long-range order within the crystal. A full table of structure refinement is excluded due to the model being incomplete.

**Table S2.** Crystal data and structure refinement for compound **2b**

|                                                                         |                                                                   |
|-------------------------------------------------------------------------|-------------------------------------------------------------------|
| Empirical formula                                                       | C <sub>88</sub> H <sub>68</sub> S <sub>8</sub>                    |
| Formula weight                                                          | 1381.90                                                           |
| Temperature [K]                                                         | 100.00                                                            |
| Crystal system                                                          | monoclinic                                                        |
| Space group<br>(number)                                                 | <i>Pn</i> (7)                                                     |
| <i>a</i> [Å]                                                            | 11.320(4)                                                         |
| <i>b</i> [Å]                                                            | 18.967(5)                                                         |
| <i>c</i> [Å]                                                            | 31.825(8)                                                         |
| $\alpha$ [°]                                                            | 90                                                                |
| $\beta$ [°]                                                             | 91.206(10)                                                        |
| $\gamma$ [°]                                                            | 90                                                                |
| Volume [Å <sup>3</sup> ]                                                | 6831(3)                                                           |
| <i>Z</i>                                                                | 4                                                                 |
| Crystal size [mm <sup>3</sup> ]                                         | 0.08×0.153×0.478                                                  |
| Crystal colour                                                          | clear orange                                                      |
| Crystal shape                                                           | block                                                             |
| Radiation                                                               | MoK $\alpha$<br>( $\lambda$ =0.71073 Å)                           |
| 2 $\theta$ range [°]                                                    | 3.34 to 50.00<br>(0.84 Å)                                         |
| Index ranges                                                            | -13 ≤ <i>h</i> ≤ 13<br>-22 ≤ <i>k</i> ≤ 22<br>-35 ≤ <i>l</i> ≤ 37 |
| Reflections collected                                                   | 118650                                                            |
| Independent<br>reflections                                              | 22940<br>$R_{\text{int}} = 0.1145$<br>$R_{\text{sigma}} = 0.1401$ |
| Completeness to<br>$\theta = 24.999^\circ$                              | 99.6 %                                                            |
| Data / Restraints /<br>Parameters                                       | 22940 / 241 / 1639                                                |
| Absorption<br>correction T <sub>min</sub> /T <sub>max</sub><br>(method) | 0.2389 / 0.7452<br>(multi-scan)                                   |

## Crystal structure of mo\_d8v6978\_1 (compound 7)

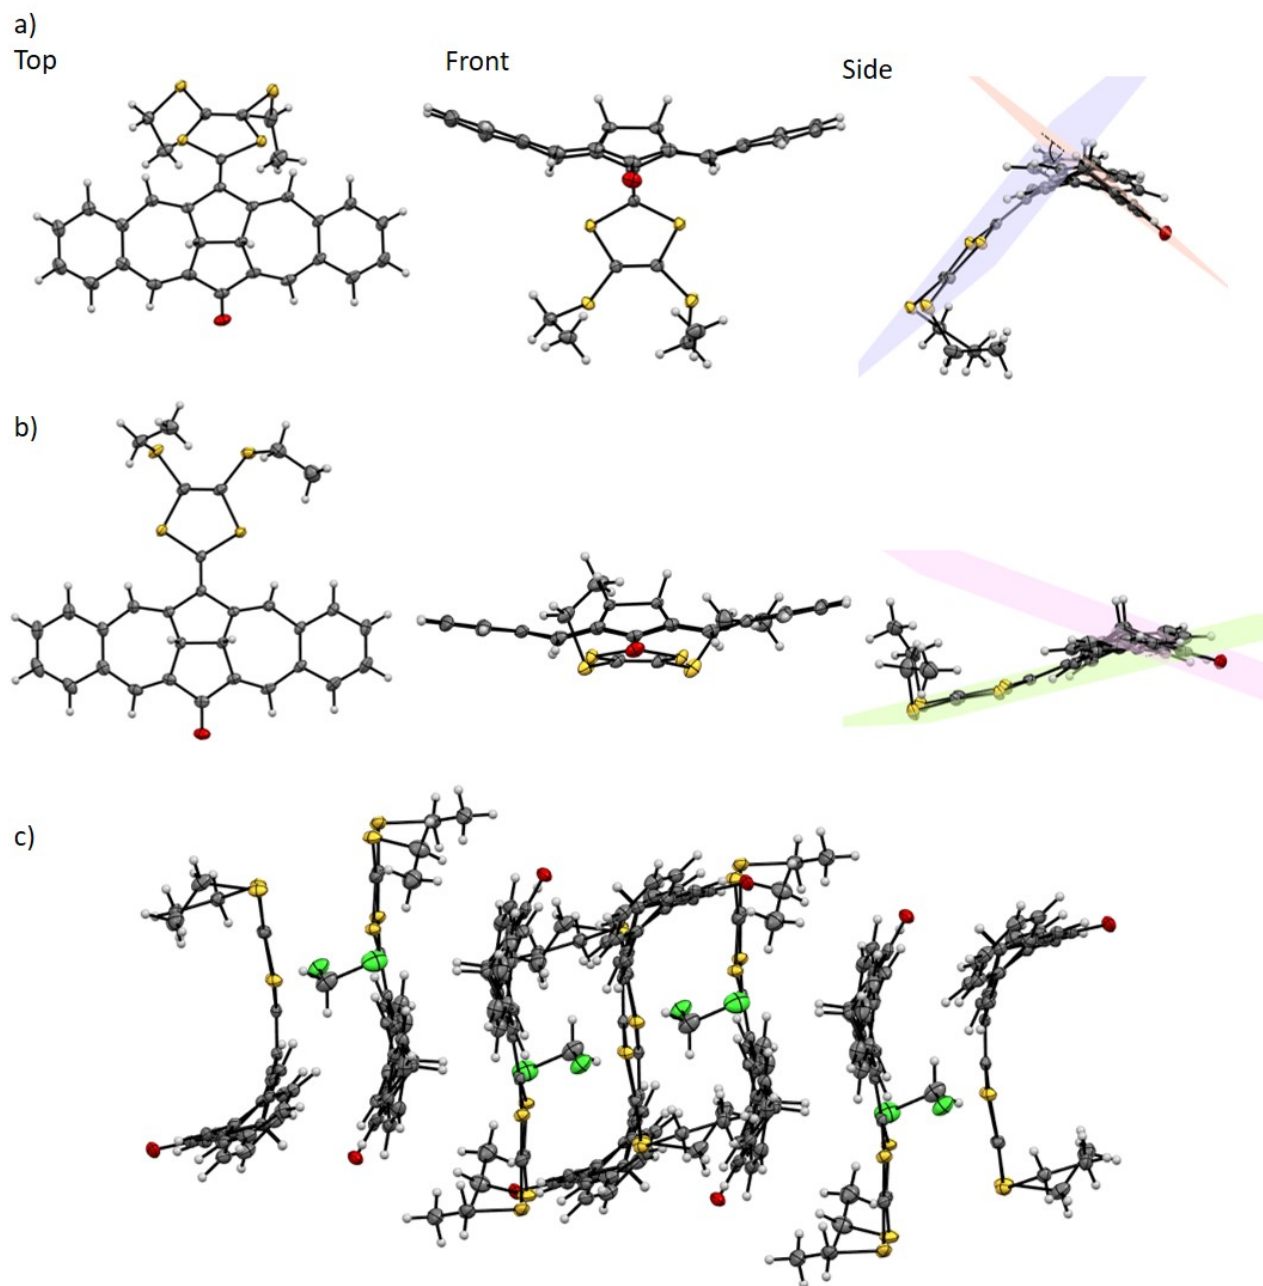

**Fig. S24** Molecular structures of **7** obtained by X-ray crystallography shown as 50% probability thermal ellipsoids of two different molecular conformers within the asymmetric unit (a and b), shown from the top view, front view and side view. c) Packing of compound **7** with co-crystallized  $\text{CH}_2\text{Cl}_2$  shown. Atoms are colored grey (carbon), yellow (sulfur), red (oxygen), white (hydrogen), and green (chlorine).

Single crystals were grown from recrystallization from  $\text{CH}_2\text{Cl}_2$  and MeOH. A clear violet, needle-shaped crystal was mounted on the goniometer. Data for mo\_d8v6978\_1 were collected from a shock-cooled single crystal at 100.00 K on a Bruker D8 Venture diffractometer equipped with a Mo  $\text{K}\alpha$  high-brilliance  $\text{I}\mu\text{S}$  radiation source ( $\lambda = 0.71073 \text{ \AA}$ ), a multilayer X-ray mirror and a PHOTON 100 CMOS detector, and an Oxford Cryosystems low temperature device. All data were integrated with SAINT V8.40B and a multi-scan absorption correction using SADABS 2016/2 was applied.<sup>4,5</sup>

The structure was solved by dual methods with SHELXT and refined by full-matrix least-squares methods against  $F^2$  using SHELXL 2019/3.<sup>6,7</sup> All non-hydrogen atoms were refined with anisotropic displacement parameters. All hydrogen atoms were refined isotropic on calculated positions using a riding model with their  $U_{\text{iso}}$  values constrained to 1.5 times the  $U_{\text{eq}}$  of their pivot atoms for terminal  $\text{sp}^3$  carbon atoms and 1.2 times for all other carbon atoms. Disordered moieties were refined using bond lengths restraints and displacement parameter restraints. Crystallographic data for the structures reported in this paper have been deposited with the Cambridge Crystallographic Data Centre.<sup>9</sup> CCDC 2548863 contains the supplementary crystallographic data for this paper. These data can be obtained free of charge from The Cambridge Crystallographic Data Centre via [www.ccdc.cam.ac.uk/structures](http://www.ccdc.cam.ac.uk/structures). This report and the CIF file were generated using FinalCif.<sup>8</sup>

**Table S3.** Crystal data and structure refinement for mo\_d8v6978\_1 (compound 7).

|                                                   |                                                                               |
|---------------------------------------------------|-------------------------------------------------------------------------------|
| CCDC number                                       | 2548863                                                                       |
| Empirical formula                                 | C <sub>63</sub> H <sub>50</sub> Cl <sub>2</sub> O <sub>2</sub> S <sub>8</sub> |
| Formula weight                                    | 1166.41                                                                       |
| Temperature [K]                                   | 100.00                                                                        |
| Crystal system                                    | triclinic                                                                     |
| Space group (number)                              | $P\bar{1}$ (2)                                                                |
| <i>a</i> [Å]                                      | 13.649(3)                                                                     |
| <i>b</i> [Å]                                      | 14.877(4)                                                                     |
| <i>c</i> [Å]                                      | 14.912(3)                                                                     |
| $\alpha$ [°]                                      | 76.215(6)                                                                     |
| $\beta$ [°]                                       | 69.224(4)                                                                     |
| $\gamma$ [°]                                      | 71.805(7)                                                                     |
| Volume [Å <sup>3</sup> ]                          | 2661.5(10)                                                                    |
| <i>Z</i>                                          | 2                                                                             |
| $\rho_{\text{calc}}$ [gcm <sup>-3</sup> ]         | 1.455                                                                         |
| $\mu$ [mm <sup>-1</sup> ]                         | 0.483                                                                         |
| <i>F</i> (000)                                    | 1212                                                                          |
| Crystal size [mm <sup>3</sup> ]                   | 0.063×0.066×0.234                                                             |
| Crystal colour                                    | clear violet                                                                  |
| Crystal shape                                     | needle                                                                        |
| Radiation                                         | MoK $\alpha$ ( $\lambda$ =0.71073 Å)                                          |
| 2 $\theta$ range [°]                              | 4.92 to 53.40 (0.79 Å)                                                        |
| Index ranges                                      | -17 ≤ <i>h</i> ≤ 17<br>-18 ≤ <i>k</i> ≤ 18<br>-18 ≤ <i>l</i> ≤ 18             |
| Reflections collected                             | 116216                                                                        |
| Independent reflections                           | 11252<br>$R_{\text{int}} = 0.1115$<br>$R_{\text{sigma}} = 0.0524$             |
| Completeness to<br>$\theta = 25.242^\circ$        | 99.9 %                                                                        |
| Data / Restraints /<br>Parameters                 | 11252 / 0 / 680                                                               |
| Absorption correction                             | 0.6638 / 0.7456                                                               |
| T <sub>min</sub> /T <sub>max</sub> (method)       | (multi-scan)                                                                  |
| Goodness-of-fit on <i>F</i> <sup>2</sup>          | 1.060                                                                         |
| Final <i>R</i> indexes<br>[ $I \geq 2\sigma(I)$ ] | $R_1 = 0.0458$<br>$wR_2 = 0.1116$                                             |
| Final <i>R</i> indexes<br>[all data]              | $R_1 = 0.0722$<br>$wR_2 = 0.1223$                                             |
| Largest peak/hole [eÅ <sup>-3</sup> ]             | 1.04/-0.73                                                                    |

Table S4. Atomic coordinates and  $U_{eq}$  [ $\text{\AA}^2$ ] for mo\_d8v6978\_1

| Atom | <i>x</i>    | <i>y</i>    | <i>z</i>     | $U_{eq}$    |
|------|-------------|-------------|--------------|-------------|
| S1   | 0.74953(6)  | 0.87812(5)  | 0.17831(5)   | 0.02737(16) |
| S2   | 0.52381(5)  | 0.86110(5)  | 0.26765(5)   | 0.01995(14) |
| S3   | 0.75146(5)  | 0.77907(5)  | -0.00523(5)  | 0.02200(15) |
| S4   | 0.51766(5)  | 0.78157(5)  | 0.10994(4)   | 0.01926(14) |
| S5   | 0.92989(6)  | 0.64133(6)  | 0.29891(6)   | 0.03126(18) |
| S6   | 0.69363(5)  | 0.64961(5)  | 0.35344(5)   | 0.02150(15) |
| S7   | 0.71677(5)  | 0.55441(5)  | 0.19571(5)   | 0.02245(15) |
| S8   | 0.95601(6)  | 0.52875(5)  | 0.11381(5)   | 0.02860(17) |
| C19  | 0.36768(8)  | 1.18592(8)  | 0.32212(7)   | 0.0555(3)   |
| C110 | 0.41438(7)  | 1.13533(6)  | 0.50827(6)   | 0.0411(2)   |
| O1   | 0.04347(16) | 1.12533(14) | 0.20865(14)  | 0.0306(5)   |
| O2   | 0.09819(15) | 0.68963(14) | 0.42978(15)  | 0.0290(4)   |
| C1   | 0.6397(3)   | 1.0651(2)   | 0.1175(3)    | 0.0401(8)   |
| H1A  | 0.647168    | 1.123313    | 0.071040     | 0.060       |
| H1B  | 0.619210    | 1.079548    | 0.183464     | 0.060       |
| H1C  | 0.583611    | 1.040876    | 0.111408     | 0.060       |
| C2   | 0.7466(3)   | 0.9899(2)   | 0.0968(2)    | 0.0351(7)   |
| H2A  | 0.803155    | 1.017200    | 0.098778     | 0.042       |
| H2B  | 0.765856    | 0.976149    | 0.029998     | 0.042       |
| C3   | 0.6405(2)   | 0.84642(19) | 0.16862(19)  | 0.0206(5)   |
| C4   | 0.4444(2)   | 0.82501(17) | 0.22043(17)  | 0.0175(5)   |
| C5   | 0.3343(2)   | 0.83645(17) | 0.26244(18)  | 0.0178(5)   |
| C6   | 0.2599(2)   | 0.82338(18) | 0.21936(18)  | 0.0187(5)   |
| C7   | 0.2783(2)   | 0.77930(19) | 0.14293(18)  | 0.0207(5)   |
| H7   | 0.350732    | 0.745944    | 0.114050     | 0.025       |
| C8   | 0.1971(2)   | 0.7786(2)   | 0.10135(18)  | 0.0216(6)   |
| C9   | 0.2173(2)   | 0.6985(2)   | 0.05616(19)  | 0.0248(6)   |
| H9   | 0.281722    | 0.649338    | 0.055072     | 0.030       |
| C10  | 0.1472(2)   | 0.6888(2)   | 0.01358(19)  | 0.0286(6)   |
| H10  | 0.161370    | 0.632108    | -0.012652    | 0.034       |
| C11  | 0.0552(2)   | 0.7626(2)   | 0.0092(2)    | 0.0319(7)   |
| H11  | 0.006373    | 0.756904    | -0.020173    | 0.038       |
| C12  | 0.6501(2)   | 0.9410(2)   | -0.1124(2)   | 0.0294(6)   |
| H12A | 0.705720    | 0.971223    | -0.115425    | 0.044       |
| H12B | 0.587505    | 0.956163    | -0.055304    | 0.044       |
| H12C | 0.627468    | 0.965113    | -0.171026    | 0.044       |
| C13  | 0.6959(2)   | 0.83307(19) | -0.10538(19) | 0.0238(6)   |
| H13A | 0.753527    | 0.818352    | -0.166690    | 0.029       |
| H13B | 0.637742    | 0.803234    | -0.098739    | 0.029       |
| C14  | 0.6388(2)   | 0.80891(18) | 0.09567(18)  | 0.0201(5)   |
| C15  | 0.1452(2)   | 0.86989(18) | 0.27432(18)  | 0.0196(5)   |
| H15  | 0.099311    | 0.823020    | 0.300844     | 0.023       |
| C16  | 0.1532(2)   | 0.91140(18) | 0.35533(18)  | 0.0197(5)   |
| H16  | 0.108911    | 0.885928    | 0.420270     | 0.024       |
| C17  | 0.1143(2)   | 1.01804(19) | 0.33438(19)  | 0.0234(6)   |
| C18  | 0.1133(2)   | 1.07875(19) | 0.3887(2)    | 0.0246(6)   |
| H18  | 0.084997    | 1.144971    | 0.370525     | 0.030       |
| C19  | 0.1519(2)   | 1.05165(19) | 0.47278(19)  | 0.0220(6)   |
| C20  | 0.1062(2)   | 1.1149(2)   | 0.5428(2)    | 0.0265(6)   |
| H20  | 0.053786    | 1.172295    | 0.532041     | 0.032       |
| C21  | 0.1356(2)   | 1.0957(2)   | 0.6259(2)    | 0.0278(6)   |

|      |           |             |             |           |
|------|-----------|-------------|-------------|-----------|
| H21  | 0.102396  | 1.138713    | 0.672301    | 0.033     |
| C22  | 0.2138(2) | 1.0131(2)   | 0.6417(2)   | 0.0266(6) |
| H22  | 0.232345  | 0.998266    | 0.700129    | 0.032     |
| C23  | 0.2646(2) | 0.95250(19) | 0.57221(19) | 0.0225(6) |
| H23  | 0.320856  | 0.898132    | 0.582249    | 0.027     |
| C24  | 0.2355(2) | 0.96892(18) | 0.48737(18) | 0.0198(5) |
| C25  | 0.3032(2) | 0.90549(18) | 0.41474(18) | 0.0196(5) |
| H25  | 0.376043  | 0.877179    | 0.414486    | 0.023     |
| C26  | 0.2716(2) | 0.88367(17) | 0.34840(18) | 0.0182(5) |
| C27  | 0.0787(2) | 1.04418(19) | 0.24633(19) | 0.0241(6) |
| C28  | 0.0978(2) | 0.9541(2)   | 0.21003(19) | 0.0228(6) |
| C29  | 0.0758(2) | 0.9440(2)   | 0.13251(19) | 0.0255(6) |
| H29  | 0.039830  | 0.999763    | 0.098934    | 0.031     |
| C30  | 0.1032(2) | 0.8540(2)   | 0.09614(18) | 0.0248(6) |
| C31  | 0.0364(2) | 0.8440(2)   | 0.0482(2)   | 0.0292(6) |
| H31  | -0.024373 | 0.895337    | 0.042334    | 0.035     |
| C32  | 0.8453(3) | 0.6351(3)   | 0.5051(3)   | 0.0442(8) |
| H32A | 0.770723  | 0.646040    | 0.505007    | 0.066     |
| H32B | 0.862514  | 0.696664    | 0.494926    | 0.066     |
| H32C | 0.852965  | 0.599239    | 0.567589    | 0.066     |
| C64  | 0.9221(3) | 0.5784(3)   | 0.4246(2)   | 0.0403(8) |
| H64A | 0.899807  | 0.518891    | 0.432965    | 0.048     |
| H64B | 0.995495  | 0.559724    | 0.431734    | 0.048     |
| C34  | 0.8260(2) | 0.61187(19) | 0.2779(2)   | 0.0235(6) |
| C35  | 0.6287(2) | 0.59859(18) | 0.30287(18) | 0.0181(5) |
| C36  | 0.5237(2) | 0.59169(17) | 0.34472(18) | 0.0172(5) |
| C37  | 0.4666(2) | 0.54755(17) | 0.30671(18) | 0.0182(5) |
| C38  | 0.4919(2) | 0.52436(18) | 0.21764(18) | 0.0211(5) |
| H38  | 0.557171  | 0.536633    | 0.171909    | 0.025     |
| C39  | 0.4300(2) | 0.48235(19) | 0.18355(19) | 0.0226(6) |
| C40  | 0.4899(3) | 0.4253(2)   | 0.1096(2)   | 0.0287(6) |
| H40  | 0.566688  | 0.411889    | 0.089173    | 0.034     |
| C41  | 0.4405(3) | 0.3880(2)   | 0.0657(2)   | 0.0333(7) |
| H41  | 0.483504  | 0.347864    | 0.017660    | 0.040     |
| C42  | 0.3290(3) | 0.4088(2)   | 0.0913(2)   | 0.0359(7) |
| H42  | 0.295125  | 0.383775    | 0.060535    | 0.043     |
| C43  | 0.8357(2) | 0.56789(19) | 0.2048(2)   | 0.0238(6) |
| C44  | 0.9800(2) | 0.3995(2)   | 0.1491(2)   | 0.0309(7) |
| H44A | 0.914015  | 0.380386    | 0.156541    | 0.037     |
| H44B | 1.039231  | 0.368011    | 0.096340    | 0.037     |
| C45  | 1.0095(3) | 0.3640(2)   | 0.2419(2)   | 0.0375(7) |
| H45A | 1.023047  | 0.294163    | 0.255288    | 0.056     |
| H45B | 0.949719  | 0.392104    | 0.295326    | 0.056     |
| H45C | 1.074813  | 0.382544    | 0.235331    | 0.056     |
| C46  | 0.2674(3) | 0.4664(2)   | 0.1619(2)   | 0.0317(7) |
| H46  | 0.190723  | 0.482529    | 0.177816    | 0.038     |
| C47  | 0.3154(2) | 0.50199(19) | 0.2113(2)   | 0.0247(6) |
| C48  | 0.2426(2) | 0.56395(19) | 0.2829(2)   | 0.0249(6) |
| H48  | 0.173635  | 0.597377    | 0.275287    | 0.030     |
| C49  | 0.2644(2) | 0.57783(18) | 0.35832(19) | 0.0211(5) |
| C50  | 0.1916(2) | 0.64499(18) | 0.4267(2)   | 0.0224(6) |
| C51  | 0.2507(2) | 0.64791(18) | 0.49135(18) | 0.0201(5) |
| C52  | 0.3574(2) | 0.57418(17) | 0.47216(18) | 0.0172(5) |
| H52  | 0.359834  | 0.524754    | 0.530544    | 0.021     |

|      |           |             |             |           |
|------|-----------|-------------|-------------|-----------|
| C53  | 0.4525(2) | 0.61811(18) | 0.43998(18) | 0.0176(5) |
| C54  | 0.4625(2) | 0.67025(18) | 0.49758(18) | 0.0193(5) |
| H54  | 0.525271  | 0.694160    | 0.474210    | 0.023     |
| C55  | 0.3874(2) | 0.69411(18) | 0.59197(18) | 0.0208(5) |
| C56  | 0.4335(2) | 0.70921(19) | 0.65609(19) | 0.0235(6) |
| H56  | 0.510038  | 0.696055    | 0.639227    | 0.028     |
| C57  | 0.3705(3) | 0.7428(2)   | 0.7433(2)   | 0.0281(6) |
| H57  | 0.403972  | 0.750454    | 0.786082    | 0.034     |
| C58  | 0.2588(2) | 0.7650(2)   | 0.7678(2)   | 0.0286(6) |
| H58  | 0.215186  | 0.788889    | 0.826916    | 0.034     |
| C59  | 0.2113(2) | 0.75224(19) | 0.7059(2)   | 0.0272(6) |
| H59  | 0.134520  | 0.769141    | 0.722541    | 0.033     |
| C60  | 0.2727(2) | 0.71494(18) | 0.61859(18) | 0.0212(5) |
| C61  | 0.2144(2) | 0.70710(19) | 0.55768(19) | 0.0230(6) |
| H61  | 0.143606  | 0.747828    | 0.565460    | 0.028     |
| C62  | 0.3662(2) | 0.52843(18) | 0.38598(17) | 0.0175(5) |
| H62  | 0.372710  | 0.458152    | 0.404938    | 0.021     |
| C63  | 0.4400(3) | 1.1000(3)   | 0.3951(2)   | 0.0440(8) |
| H63A | 0.518463  | 1.088954    | 0.360213    | 0.053     |
| H63B | 0.419948  | 1.038919    | 0.406430    | 0.053     |

$U_{eq}$  is defined as 1/3 of the trace of the orthogonalized  $U_{ij}$  tensor.

Table S5. Anisotropic displacement parameters [ $\text{\AA}^2$ ] for mo\_d8v6978\_1. The anisotropic displacement factor exponent takes the form:  $-2\pi^2 [ h^2(a^*)^2U_{11} + k^2(b^*)^2U_{22} + \dots + 2hka^*b^*U_{12} ]$

| Atom | $U_{11}$   | $U_{22}$   | $U_{33}$   | $U_{23}$    | $U_{13}$    | $U_{12}$    |
|------|------------|------------|------------|-------------|-------------|-------------|
| S1   | 0.0216(3)  | 0.0334(4)  | 0.0314(4)  | -0.0128(3)  | -0.0047(3)  | -0.0107(3)  |
| S2   | 0.0184(3)  | 0.0212(3)  | 0.0208(3)  | -0.0081(3)  | -0.0032(2)  | -0.0049(3)  |
| S3   | 0.0175(3)  | 0.0238(3)  | 0.0220(3)  | -0.0082(3)  | -0.0012(2)  | -0.0032(3)  |
| S4   | 0.0178(3)  | 0.0197(3)  | 0.0209(3)  | -0.0076(2)  | -0.0032(2)  | -0.0051(3)  |
| S5   | 0.0198(4)  | 0.0311(4)  | 0.0444(4)  | -0.0131(3)  | -0.0039(3)  | -0.0095(3)  |
| S6   | 0.0171(3)  | 0.0208(3)  | 0.0264(3)  | -0.0099(3)  | -0.0022(3)  | -0.0047(3)  |
| S7   | 0.0208(3)  | 0.0234(3)  | 0.0212(3)  | -0.0086(3)  | -0.0006(3)  | -0.0056(3)  |
| S8   | 0.0231(4)  | 0.0226(4)  | 0.0308(4)  | -0.0082(3)  | 0.0057(3)   | -0.0058(3)  |
| C19  | 0.0504(6)  | 0.0775(7)  | 0.0495(5)  | -0.0110(5)  | -0.0199(4)  | -0.0241(5)  |
| C110 | 0.0489(5)  | 0.0452(5)  | 0.0331(4)  | -0.0102(3)  | -0.0026(3)  | -0.0252(4)  |
| O1   | 0.0271(11) | 0.0208(10) | 0.0334(11) | 0.0007(8)   | -0.0062(9)  | 0.0015(9)   |
| O2   | 0.0202(10) | 0.0224(10) | 0.0430(12) | -0.0036(9)  | -0.0113(9)  | -0.0020(8)  |
| C1   | 0.0427(19) | 0.0278(17) | 0.0461(19) | -0.0059(14) | -0.0044(15) | -0.0138(15) |
| C2   | 0.0378(18) | 0.0395(18) | 0.0307(16) | -0.0109(14) | 0.0012(13)  | -0.0222(15) |

|     |            |            |            |             |             |             |
|-----|------------|------------|------------|-------------|-------------|-------------|
| C3  | 0.0174(13) | 0.0192(13) | 0.0238(13) | -0.0063(10) | -0.0037(10) | -0.0033(10) |
| C4  | 0.0214(13) | 0.0127(12) | 0.0180(12) | -0.0026(9)  | -0.0062(10) | -0.0032(10) |
| C5  | 0.0174(12) | 0.0130(12) | 0.0209(12) | -0.0018(10) | -0.0051(10) | -0.0024(10) |
| C6  | 0.0171(13) | 0.0154(12) | 0.0203(12) | -0.0009(10) | -0.0032(10) | -0.0039(10) |
| C7  | 0.0194(13) | 0.0194(13) | 0.0216(13) | -0.0016(10) | -0.0043(10) | -0.0059(11) |
| C8  | 0.0201(13) | 0.0262(14) | 0.0175(12) | 0.0013(10)  | -0.0035(10) | -0.0106(11) |
| C9  | 0.0259(14) | 0.0273(15) | 0.0210(13) | -0.0007(11) | -0.0049(11) | -0.0111(12) |
| C10 | 0.0330(16) | 0.0360(17) | 0.0217(14) | -0.0007(12) | -0.0075(12) | -0.0189(14) |
| C11 | 0.0296(16) | 0.0458(19) | 0.0250(15) | -0.0017(13) | -0.0076(12) | -0.0193(14) |
| C12 | 0.0283(15) | 0.0222(15) | 0.0307(15) | -0.0009(12) | -0.0032(12) | -0.0058(12) |
| C13 | 0.0254(14) | 0.0232(14) | 0.0210(13) | -0.0043(11) | -0.0038(11) | -0.0063(12) |
| C14 | 0.0187(13) | 0.0185(13) | 0.0215(13) | -0.0049(10) | -0.0027(10) | -0.0048(10) |
| C15 | 0.0162(13) | 0.0196(13) | 0.0203(12) | -0.0011(10) | -0.0029(10) | -0.0053(10) |
| C16 | 0.0154(12) | 0.0185(13) | 0.0216(13) | -0.0038(10) | -0.0015(10) | -0.0033(10) |
| C17 | 0.0173(13) | 0.0206(14) | 0.0252(14) | -0.0033(11) | -0.0011(11) | -0.0013(11) |
| C18 | 0.0194(13) | 0.0154(13) | 0.0309(15) | -0.0028(11) | -0.0002(11) | -0.0020(11) |
| C19 | 0.0192(13) | 0.0170(13) | 0.0269(14) | -0.0054(11) | -0.0002(11) | -0.0071(11) |
| C20 | 0.0193(14) | 0.0187(14) | 0.0372(16) | -0.0091(12) | 0.0017(12)  | -0.0072(11) |
| C21 | 0.0253(15) | 0.0270(15) | 0.0302(15) | -0.0146(12) | 0.0029(12)  | -0.0106(12) |
| C22 | 0.0272(15) | 0.0248(15) | 0.0299(15) | -0.0106(12) | -0.0037(12) | -0.0101(12) |
| C23 | 0.0231(14) | 0.0189(13) | 0.0242(13) | -0.0071(11) | -0.0021(11) | -0.0066(11) |
| C24 | 0.0175(13) | 0.0169(13) | 0.0215(13) | -0.0060(10) | 0.0016(10)  | -0.0058(10) |
| C25 | 0.0168(12) | 0.0148(12) | 0.0240(13) | -0.0048(10) | -0.0024(10) | -0.0025(10) |
| C26 | 0.0169(12) | 0.0124(12) | 0.0219(13) | -0.0017(10) | -0.0027(10) | -0.0034(10) |
| C27 | 0.0169(13) | 0.0217(14) | 0.0241(14) | -0.0010(11) | 0.0006(11)  | -0.0013(11) |
| C28 | 0.0133(12) | 0.0266(15) | 0.0229(13) | -0.0010(11) | -0.0005(10) | -0.0050(11) |
| C29 | 0.0172(13) | 0.0269(15) | 0.0248(14) | 0.0016(11)  | -0.0034(11) | -0.0024(11) |
| C30 | 0.0232(14) | 0.0304(15) | 0.0171(13) | 0.0029(11)  | -0.0036(10) | -0.0095(12) |
| C31 | 0.0209(14) | 0.0393(17) | 0.0235(14) | 0.0026(12)  | -0.0058(11) | -0.0088(13) |

|     |            |            |            |             |             |             |
|-----|------------|------------|------------|-------------|-------------|-------------|
| C32 | 0.045(2)   | 0.047(2)   | 0.045(2)   | -0.0043(16) | -0.0145(16) | -0.0175(17) |
| C64 | 0.0345(18) | 0.049(2)   | 0.0427(19) | -0.0132(16) | -0.0164(15) | -0.0077(16) |
| C34 | 0.0195(13) | 0.0175(13) | 0.0289(14) | -0.0055(11) | -0.0005(11) | -0.0045(11) |
| C35 | 0.0210(13) | 0.0142(12) | 0.0180(12) | -0.0034(10) | -0.0042(10) | -0.0039(10) |
| C36 | 0.0195(13) | 0.0122(12) | 0.0192(12) | -0.0033(9)  | -0.0052(10) | -0.0030(10) |
| C37 | 0.0194(13) | 0.0132(12) | 0.0209(12) | -0.0022(10) | -0.0057(10) | -0.0033(10) |
| C38 | 0.0241(14) | 0.0195(13) | 0.0198(13) | -0.0015(10) | -0.0058(10) | -0.0076(11) |
| C39 | 0.0310(15) | 0.0182(13) | 0.0213(13) | -0.0004(10) | -0.0095(11) | -0.0098(12) |
| C40 | 0.0386(17) | 0.0262(15) | 0.0244(14) | -0.0052(11) | -0.0098(12) | -0.0108(13) |
| C41 | 0.052(2)   | 0.0264(16) | 0.0273(15) | -0.0058(12) | -0.0141(14) | -0.0143(14) |
| C42 | 0.058(2)   | 0.0255(16) | 0.0389(17) | 0.0003(13)  | -0.0268(16) | -0.0209(15) |
| C43 | 0.0211(14) | 0.0176(13) | 0.0288(14) | -0.0053(11) | -0.0011(11) | -0.0057(11) |
| C44 | 0.0250(15) | 0.0218(15) | 0.0377(16) | -0.0112(12) | 0.0030(12)  | -0.0036(12) |
| C45 | 0.0326(17) | 0.0283(17) | 0.051(2)   | -0.0014(14) | -0.0102(15) | -0.0124(14) |
| C46 | 0.0418(18) | 0.0238(15) | 0.0406(17) | 0.0005(13)  | -0.0226(14) | -0.0154(14) |
| C47 | 0.0340(16) | 0.0166(13) | 0.0269(14) | 0.0018(11)  | -0.0133(12) | -0.0101(12) |
| C48 | 0.0210(14) | 0.0207(14) | 0.0350(15) | 0.0001(11)  | -0.0110(12) | -0.0080(11) |
| C49 | 0.0210(13) | 0.0145(13) | 0.0287(14) | 0.0002(10)  | -0.0090(11) | -0.0067(11) |
| C50 | 0.0212(14) | 0.0136(12) | 0.0300(14) | 0.0030(10)  | -0.0076(11) | -0.0059(11) |
| C51 | 0.0180(13) | 0.0161(13) | 0.0228(13) | 0.0003(10)  | -0.0028(10) | -0.0057(10) |
| C52 | 0.0180(12) | 0.0128(12) | 0.0191(12) | -0.0024(9)  | -0.0030(10) | -0.0046(10) |
| C53 | 0.0165(12) | 0.0144(12) | 0.0195(12) | -0.0008(9)  | -0.0058(10) | -0.0016(10) |
| C54 | 0.0183(13) | 0.0163(13) | 0.0223(13) | -0.0041(10) | -0.0061(10) | -0.0022(10) |
| C55 | 0.0250(14) | 0.0147(12) | 0.0184(12) | -0.0036(10) | -0.0026(10) | -0.0028(11) |
| C56 | 0.0255(14) | 0.0181(13) | 0.0241(13) | -0.0055(11) | -0.0054(11) | -0.0025(11) |
| C57 | 0.0408(17) | 0.0202(14) | 0.0219(14) | -0.0053(11) | -0.0097(12) | -0.0040(13) |
| C58 | 0.0357(16) | 0.0204(14) | 0.0217(14) | -0.0064(11) | 0.0028(12)  | -0.0066(12) |
| C59 | 0.0263(15) | 0.0183(14) | 0.0274(14) | -0.0045(11) | 0.0040(12)  | -0.0057(12) |
| C60 | 0.0214(13) | 0.0147(13) | 0.0223(13) | -0.0045(10) | 0.0004(10)  | -0.0043(11) |

|     |            |            |            |             |             |             |
|-----|------------|------------|------------|-------------|-------------|-------------|
| C61 | 0.0165(13) | 0.0156(13) | 0.0287(14) | -0.0014(11) | 0.0016(11)  | -0.0039(10) |
| C62 | 0.0195(13) | 0.0132(12) | 0.0192(12) | -0.0025(10) | -0.0046(10) | -0.0045(10) |
| C63 | 0.050(2)   | 0.049(2)   | 0.0385(18) | -0.0125(16) | -0.0060(16) | -0.0241(18) |
|     |            |            |            |             |             |             |

Table S6. Bond lengths and angles for compound 7

| Atom-Atom | Length [Å] |
|-----------|------------|
| S1-C2     | 1.810(3)   |
| S1-C3     | 1.756(3)   |
| S2-C3     | 1.741(3)   |
| S2-C4     | 1.745(3)   |
| S3-C13    | 1.817(3)   |
| S3-C14    | 1.754(3)   |
| S4-C4     | 1.751(2)   |
| S4-C14    | 1.753(3)   |
| S5-C64    | 1.867(3)   |
| S5-C34    | 1.752(3)   |
| S6-C34    | 1.753(3)   |
| S6-C35    | 1.760(3)   |
| S7-C35    | 1.753(2)   |
| S7-C43    | 1.751(3)   |
| S8-C43    | 1.753(3)   |
| S8-C44    | 1.824(3)   |
| C19-C63   | 1.762(4)   |
| C110-C63  | 1.770(3)   |
| O1-C27    | 1.229(3)   |
| O2-C50    | 1.230(3)   |
| C1-H1A    | 0.9800     |
| C1-H1B    | 0.9800     |
| C1-H1C    | 0.9800     |
| C1-C2     | 1.516(5)   |
| C2-H2A    | 0.9900     |
| C2-H2B    | 0.9900     |
| C3-C14    | 1.345(4)   |
| C4-C5     | 1.379(4)   |
| C5-C6     | 1.459(4)   |
| C5-C26    | 1.464(3)   |

|          |          |
|----------|----------|
| C6-C7    | 1.357(4) |
| C6-C15   | 1.511(3) |
| C7-H7    | 0.9500   |
| C7-C8    | 1.453(4) |
| C8-C9    | 1.413(4) |
| C8-C30   | 1.428(4) |
| C9-H9    | 0.9500   |
| C9-C10   | 1.379(4) |
| C10-H10  | 0.9500   |
| C10-C11  | 1.396(4) |
| C11-H11  | 0.9500   |
| C11-C31  | 1.381(4) |
| C12-H12A | 0.9800   |
| C12-H12B | 0.9800   |
| C12-H12C | 0.9800   |
| C12-C13  | 1.523(4) |
| C13-H13A | 0.9900   |
| C13-H13B | 0.9900   |
| C15-H15  | 1.0000   |
| C15-C16  | 1.531(4) |
| C15-C28  | 1.507(4) |
| C16-H16  | 1.0000   |
| C16-C17  | 1.501(4) |
| C16-C26  | 1.509(3) |
| C17-C18  | 1.343(4) |
| C17-C27  | 1.484(4) |
| C18-H18  | 0.9500   |
| C18-C19  | 1.452(4) |
| C19-C20  | 1.416(4) |
| C19-C24  | 1.427(4) |
| C20-H20  | 0.9500   |
| C20-C21  | 1.374(4) |

|          |          |
|----------|----------|
| C21-H21  | 0.9500   |
| C21-C22  | 1.387(4) |
| C22-H22  | 0.9500   |
| C22-C23  | 1.383(4) |
| C23-H23  | 0.9500   |
| C23-C24  | 1.402(4) |
| C24-C25  | 1.466(3) |
| C25-H25  | 0.9500   |
| C25-C26  | 1.346(4) |
| C27-C28  | 1.478(4) |
| C28-C29  | 1.343(4) |
| C29-H29  | 0.9500   |
| C29-C30  | 1.455(4) |
| C30-C31  | 1.400(4) |
| C31-H31  | 0.9500   |
| C32-H32A | 0.9800   |
| C32-H32B | 0.9800   |
| C32-H32C | 0.9800   |
| C32-C64  | 1.513(5) |
| C64-H64A | 0.9900   |
| C64-H64B | 0.9900   |
| C34-C43  | 1.349(4) |
| C35-C36  | 1.371(4) |
| C36-C37  | 1.473(3) |
| C36-C53  | 1.471(3) |
| C37-C38  | 1.349(4) |
| C37-C62  | 1.513(3) |
| C38-H38  | 0.9500   |
| C38-C39  | 1.466(4) |
| C39-C40  | 1.407(4) |
| C39-C47  | 1.420(4) |
| C40-H40  | 0.9500   |

|          |          |
|----------|----------|
| C40-C41  | 1.381(4) |
| C41-H41  | 0.9500   |
| C41-C42  | 1.381(5) |
| C42-H42  | 0.9500   |
| C42-C46  | 1.379(4) |
| C44-H44A | 0.9900   |
| C44-H44B | 0.9900   |
| C44-C45  | 1.506(4) |
| C45-H45A | 0.9800   |
| C45-H45B | 0.9800   |
| C45-H45C | 0.9800   |
| C46-H46  | 0.9500   |
| C46-C47  | 1.413(4) |
| C47-C48  | 1.456(4) |
| C48-H48  | 0.9500   |
| C48-C49  | 1.335(4) |
| C49-C50  | 1.474(4) |
| C49-C62  | 1.506(4) |
| C50-C51  | 1.474(4) |
| C51-C52  | 1.504(3) |
| C51-C61  | 1.339(4) |
| C52-H52  | 1.0000   |
| C52-C53  | 1.510(3) |
| C52-C62  | 1.544(3) |
| C53-C54  | 1.351(4) |
| C54-H54  | 0.9500   |
| C54-C55  | 1.464(3) |
| C55-C56  | 1.406(4) |
| C55-C60  | 1.421(4) |
| C56-H56  | 0.9500   |
| C56-C57  | 1.389(4) |
| C57-H57  | 0.9500   |

|                       |                  |
|-----------------------|------------------|
| C57–C58               | 1.384(4)         |
| C58–H58               | 0.9500           |
| C58–C59               | 1.376(4)         |
| C59–H59               | 0.9500           |
| C59–C60               | 1.409(4)         |
| C60–C61               | 1.447(4)         |
| C61–H61               | 0.9500           |
| C62–H62               | 1.0000           |
| C63–H63A              | 0.9900           |
| C63–H63B              | 0.9900           |
|                       |                  |
| <b>Atom–Atom–Atom</b> | <b>Angle [°]</b> |
| C3–S1–C2              | 100.74(14)       |
| C3–S2–C4              | 96.93(12)        |
| C14–S3–C13            | 102.24(13)       |
| C4–S4–C14             | 96.85(12)        |
| C34–S5–C64            | 101.52(14)       |
| C34–S6–C35            | 97.89(13)        |
| C43–S7–C35            | 97.22(13)        |
| C43–S8–C44            | 100.73(13)       |
| H1A–C1–H1B            | 109.5            |
| H1A–C1–H1C            | 109.5            |
| H1B–C1–H1C            | 109.5            |
| C2–C1–H1A             | 109.5            |
| C2–C1–H1B             | 109.5            |
| C2–C1–H1C             | 109.5            |
| S1–C2–H2A             | 108.3            |
| S1–C2–H2B             | 108.3            |
| C1–C2–S1              | 115.8(2)         |
| C1–C2–H2A             | 108.3            |
| C1–C2–H2B             | 108.3            |
| H2A–C2–H2B            | 107.4            |

|               |            |
|---------------|------------|
| S2–C3–S1      | 115.49(15) |
| C14–C3–S1     | 127.4(2)   |
| C14–C3–S2     | 117.1(2)   |
| S2–C4–S4      | 112.66(14) |
| C5–C4–S2      | 123.17(19) |
| C5–C4–S4      | 124.0(2)   |
| C4–C5–C6      | 126.3(2)   |
| C4–C5–C26     | 123.5(2)   |
| C6–C5–C26     | 109.0(2)   |
| C5–C6–C15     | 109.1(2)   |
| C7–C6–C5      | 131.2(2)   |
| C7–C6–C15     | 119.7(2)   |
| C6–C7–H7      | 117.1      |
| C6–C7–C8      | 125.8(2)   |
| C8–C7–H7      | 117.1      |
| C9–C8–C7      | 116.6(2)   |
| C9–C8–C30     | 117.3(2)   |
| C30–C8–C7     | 126.0(3)   |
| C8–C9–H9      | 118.7      |
| C10–C9–C8     | 122.6(3)   |
| C10–C9–H9     | 118.7      |
| C9–C10–H10    | 120.1      |
| C9–C10–C11    | 119.7(3)   |
| C11–C10–H10   | 120.1      |
| C10–C11–H11   | 120.6      |
| C31–C11–C10   | 118.9(3)   |
| C31–C11–H11   | 120.6      |
| H12A–C12–H12B | 109.5      |
| H12A–C12–H12C | 109.5      |
| H12B–C12–H12C | 109.5      |
| C13–C12–H12A  | 109.5      |
| C13–C12–H12B  | 109.5      |

|               |            |
|---------------|------------|
| C13-C12-H12C  | 109.5      |
| S3-C13-H13A   | 108.6      |
| S3-C13-H13B   | 108.6      |
| C12-C13-S3    | 114.6(2)   |
| C12-C13-H13A  | 108.6      |
| C12-C13-H13B  | 108.6      |
| H13A-C13-H13B | 107.6      |
| S4-C14-S3     | 119.76(15) |
| C3-C14-S3     | 124.0(2)   |
| C3-C14-S4     | 116.1(2)   |
| C6-C15-H15    | 111.5      |
| C6-C15-C16    | 106.3(2)   |
| C16-C15-H15   | 111.5      |
| C28-C15-C6    | 109.8(2)   |
| C28-C15-H15   | 111.5      |
| C28-C15-C16   | 105.9(2)   |
| C15-C16-H16   | 111.1      |
| C17-C16-C15   | 106.9(2)   |
| C17-C16-H16   | 111.1      |
| C17-C16-C26   | 110.1(2)   |
| C26-C16-C15   | 106.3(2)   |
| C26-C16-H16   | 111.1      |
| C18-C17-C16   | 123.7(3)   |
| C18-C17-C27   | 126.4(3)   |
| C27-C17-C16   | 109.8(2)   |
| C17-C18-H18   | 117.3      |
| C17-C18-C19   | 125.5(3)   |
| C19-C18-H18   | 117.3      |
| C20-C19-C18   | 117.0(2)   |
| C20-C19-C24   | 118.1(3)   |
| C24-C19-C18   | 124.8(2)   |
| C19-C20-H20   | 119.0      |

|             |          |
|-------------|----------|
| C21-C20-C19 | 122.0(3) |
| C21-C20-H20 | 119.0    |
| C20-C21-H21 | 120.1    |
| C20-C21-C22 | 119.7(3) |
| C22-C21-H21 | 120.1    |
| C21-C22-H22 | 120.1    |
| C23-C22-C21 | 119.8(3) |
| C23-C22-H22 | 120.1    |
| C22-C23-H23 | 119.0    |
| C22-C23-C24 | 121.9(3) |
| C24-C23-H23 | 119.0    |
| C19-C24-C25 | 124.7(2) |
| C23-C24-C19 | 118.3(2) |
| C23-C24-C25 | 116.6(2) |
| C24-C25-H25 | 117.0    |
| C26-C25-C24 | 126.0(2) |
| C26-C25-H25 | 117.0    |
| C5-C26-C16  | 108.9(2) |
| C25-C26-C5  | 131.1(2) |
| C25-C26-C16 | 119.9(2) |
| O1-C27-C17  | 126.7(3) |
| O1-C27-C28  | 126.3(3) |
| C28-C27-C17 | 107.0(2) |
| C27-C28-C15 | 110.4(2) |
| C29-C28-C15 | 122.3(3) |
| C29-C28-C27 | 127.3(3) |
| C28-C29-H29 | 117.6    |
| C28-C29-C30 | 124.9(3) |
| C30-C29-H29 | 117.6    |
| C8-C30-C29  | 123.8(3) |
| C31-C30-C8  | 118.6(3) |
| C31-C30-C29 | 117.4(3) |

|               |            |
|---------------|------------|
| C11-C31-C30   | 122.7(3)   |
| C11-C31-H31   | 118.6      |
| C30-C31-H31   | 118.6      |
| H32A-C32-H32B | 109.5      |
| H32A-C32-H32C | 109.5      |
| H32B-C32-H32C | 109.5      |
| C64-C32-H32A  | 109.5      |
| C64-C32-H32B  | 109.5      |
| C64-C32-H32C  | 109.5      |
| S5-C64-H64A   | 108.4      |
| S5-C64-H64B   | 108.4      |
| C32-C64-S5    | 115.5(3)   |
| C32-C64-H64A  | 108.4      |
| C32-C64-H64B  | 108.4      |
| H64A-C64-H64B | 107.5      |
| S5-C34-S6     | 117.90(15) |
| C43-C34-S5    | 126.6(2)   |
| C43-C34-S6    | 115.3(2)   |
| S7-C35-S6     | 111.35(14) |
| C36-C35-S6    | 123.67(19) |
| C36-C35-S7    | 124.9(2)   |
| C35-C36-C37   | 125.8(2)   |
| C35-C36-C53   | 125.8(2)   |
| C53-C36-C37   | 108.1(2)   |
| C36-C37-C62   | 109.3(2)   |
| C38-C37-C36   | 129.9(2)   |
| C38-C37-C62   | 120.8(2)   |
| C37-C38-H38   | 116.4      |
| C37-C38-C39   | 127.3(2)   |
| C39-C38-H38   | 116.4      |
| C40-C39-C38   | 116.3(3)   |
| C40-C39-C47   | 117.5(3)   |

|               |            |
|---------------|------------|
| C47-C39-C38   | 125.8(2)   |
| C39-C40-H40   | 119.0      |
| C41-C40-C39   | 122.0(3)   |
| C41-C40-H40   | 119.0      |
| C40-C41-H41   | 119.8      |
| C40-C41-C42   | 120.5(3)   |
| C42-C41-H41   | 119.8      |
| C41-C42-H42   | 120.4      |
| C46-C42-C41   | 119.3(3)   |
| C46-C42-H42   | 120.4      |
| S7-C43-S8     | 116.87(16) |
| C34-C43-S7    | 117.3(2)   |
| C34-C43-S8    | 125.7(2)   |
| S8-C44-H44A   | 108.7      |
| S8-C44-H44B   | 108.7      |
| H44A-C44-H44B | 107.6      |
| C45-C44-S8    | 114.0(2)   |
| C45-C44-H44A  | 108.7      |
| C45-C44-H44B  | 108.7      |
| C44-C45-H45A  | 109.5      |
| C44-C45-H45B  | 109.5      |
| C44-C45-H45C  | 109.5      |
| H45A-C45-H45B | 109.5      |
| H45A-C45-H45C | 109.5      |
| H45B-C45-H45C | 109.5      |
| C42-C46-H46   | 119.2      |
| C42-C46-C47   | 121.6(3)   |
| C47-C46-H46   | 119.2      |
| C39-C47-C48   | 123.9(2)   |
| C46-C47-C39   | 119.0(3)   |
| C46-C47-C48   | 116.9(3)   |
| C47-C48-H48   | 117.2      |

|             |          |
|-------------|----------|
| C49–C48–C47 | 125.6(3) |
| C49–C48–H48 | 117.2    |
| C48–C49–C50 | 124.5(3) |
| C48–C49–C62 | 125.6(2) |
| C50–C49–C62 | 109.9(2) |
| O2–C50–C49  | 126.1(3) |
| O2–C50–C51  | 126.4(3) |
| C49–C50–C51 | 107.5(2) |
| C50–C51–C52 | 109.9(2) |
| C61–C51–C50 | 125.0(3) |
| C61–C51–C52 | 125.1(2) |
| C51–C52–H52 | 110.6    |
| C51–C52–C53 | 112.4(2) |
| C51–C52–C62 | 106.1(2) |
| C53–C52–H52 | 110.6    |
| C53–C52–C62 | 106.4(2) |
| C62–C52–H52 | 110.6    |
| C36–C53–C52 | 109.2(2) |
| C54–C53–C36 | 130.5(2) |
| C54–C53–C52 | 120.4(2) |
| C53–C54–H54 | 116.3    |
| C53–C54–C55 | 127.4(2) |
| C55–C54–H54 | 116.3    |
| C56–C55–C54 | 116.0(2) |
| C56–C55–C60 | 117.9(2) |
| C60–C55–C54 | 125.6(2) |
| C55–C56–H56 | 119.0    |
| C57–C56–C55 | 122.0(3) |
| C57–C56–H56 | 119.0    |
| C56–C57–H57 | 120.1    |
| C58–C57–C56 | 119.8(3) |
| C58–C57–H57 | 120.1    |

|               |          |
|---------------|----------|
| C57–C58–H58   | 120.2    |
| C59–C58–C57   | 119.5(3) |
| C59–C58–H58   | 120.2    |
| C58–C59–H59   | 118.9    |
| C58–C59–C60   | 122.2(3) |
| C60–C59–H59   | 118.9    |
| C55–C60–C61   | 123.8(2) |
| C59–C60–C55   | 118.5(3) |
| C59–C60–C61   | 117.5(2) |
| C51–C61–C60   | 126.2(3) |
| C51–C61–H61   | 116.9    |
| C60–C61–H61   | 116.9    |
| C37–C62–C52   | 105.9(2) |
| C37–C62–H62   | 110.8    |
| C49–C62–C37   | 112.4(2) |
| C49–C62–C52   | 106.0(2) |
| C49–C62–H62   | 110.8    |
| C52–C62–H62   | 110.8    |
| C19–C63–C110  | 112.6(2) |
| C19–C63–H63A  | 109.1    |
| C19–C63–H63B  | 109.1    |
| C110–C63–H63A | 109.1    |
| C110–C63–H63B | 109.1    |
| H63A–C63–H63B | 107.8    |

Table S7. Torsion angles for mo\_d8v6978\_1

| Atom–Atom–Atom–Atom | Torsion Angle [°] |
|---------------------|-------------------|
| S1–C3–C14–S3        | 2.7(4)            |
| S1–C3–C14–S4        | 178.01(16)        |
| S2–C3–C14–S3        | –174.32(15)       |
| S2–C3–C14–S4        | 0.9(3)            |
| S2–C4–C5–C6         | 168.9(2)          |

|                |             |
|----------------|-------------|
| S2-C4-C5-C26   | 2.8(4)      |
| S4-C4-C5-C6    | -6.0(4)     |
| S4-C4-C5-C26   | -172.16(19) |
| S5-C34-C43-S7  | -175.59(16) |
| S5-C34-C43-S8  | 0.7(4)      |
| S6-C34-C43-S7  | -0.2(3)     |
| S6-C34-C43-S8  | 176.06(16)  |
| S6-C35-C36-C37 | -178.4(2)   |
| S6-C35-C36-C53 | -5.0(4)     |
| S7-C35-C36-C37 | -0.9(4)     |
| S7-C35-C36-C53 | 172.5(2)    |
| O1-C27-C28-C15 | 178.0(3)    |
| O1-C27-C28-C29 | -3.2(5)     |
| O2-C50-C51-C52 | 172.9(2)    |
| O2-C50-C51-C61 | -6.7(4)     |
| C2-S1-C3-S2    | -105.72(17) |
| C2-S1-C3-C14   | 77.2(3)     |
| C3-S1-C2-C1    | 55.1(3)     |
| C3-S2-C4-S4    | 6.21(16)    |
| C3-S2-C4-C5    | -169.2(2)   |
| C4-S2-C3-S1    | 178.16(15)  |
| C4-S2-C3-C14   | -4.4(2)     |
| C4-S4-C14-S3   | 178.51(16)  |
| C4-S4-C14-C3   | 3.0(2)      |
| C4-C5-C6-C7    | 16.1(4)     |
| C4-C5-C6-C15   | -163.5(2)   |
| C4-C5-C26-C16  | 162.2(2)    |
| C4-C5-C26-C25  | -16.3(4)    |
| C5-C6-C7-C8    | -174.0(3)   |
| C5-C6-C15-C16  | -0.8(3)     |
| C5-C6-C15-C28  | 113.3(2)    |
| C6-C5-C26-C16  | -6.1(3)     |

|                 |           |
|-----------------|-----------|
| C6-C5-C26-C25   | 175.5(3)  |
| C6-C7-C8-C9     | -151.7(3) |
| C6-C7-C8-C30    | 33.0(4)   |
| C6-C15-C16-C17  | 114.9(2)  |
| C6-C15-C16-C26  | -2.8(3)   |
| C6-C15-C28-C27  | -113.2(2) |
| C6-C15-C28-C29  | 67.8(3)   |
| C7-C6-C15-C16   | 179.5(2)  |
| C7-C6-C15-C28   | -66.4(3)  |
| C7-C8-C9-C10    | -179.8(2) |
| C7-C8-C30-C29   | 0.2(4)    |
| C7-C8-C30-C31   | 176.1(2)  |
| C8-C9-C10-C11   | 3.8(4)    |
| C8-C30-C31-C11  | 2.7(4)    |
| C9-C8-C30-C29   | -175.2(2) |
| C9-C8-C30-C31   | 0.8(4)    |
| C9-C10-C11-C31  | -0.2(4)   |
| C10-C11-C31-C30 | -3.0(4)   |
| C13-S3-C14-S4   | 52.91(19) |
| C13-S3-C14-C3   | -132.0(2) |
| C14-S3-C13-C12  | 60.1(2)   |
| C14-S4-C4-S2    | -5.82(16) |
| C14-S4-C4-C5    | 169.6(2)  |
| C15-C6-C7-C8    | 5.6(4)    |
| C15-C16-C17-C18 | -177.7(2) |
| C15-C16-C17-C27 | 2.1(3)    |
| C15-C16-C26-C5  | 5.4(3)    |
| C15-C16-C26-C25 | -176.0(2) |
| C15-C28-C29-C30 | -5.7(4)   |
| C16-C15-C28-C27 | 1.1(3)    |
| C16-C15-C28-C29 | -177.8(2) |
| C16-C17-C18-C19 | 1.9(4)    |

|                 |           |
|-----------------|-----------|
| C16-C17-C27-O1  | -179.2(3) |
| C16-C17-C27-C28 | -1.4(3)   |
| C17-C16-C26-C5  | -110.0(2) |
| C17-C16-C26-C25 | 68.6(3)   |
| C17-C18-C19-C20 | -154.5(3) |
| C17-C18-C19-C24 | 28.7(4)   |
| C17-C27-C28-C15 | 0.2(3)    |
| C17-C27-C28-C29 | 179.0(3)  |
| C18-C17-C27-O1  | 0.6(5)    |
| C18-C17-C27-C28 | 178.4(3)  |
| C18-C19-C20-C21 | 179.0(3)  |
| C18-C19-C24-C23 | 179.5(2)  |
| C18-C19-C24-C25 | 7.6(4)    |
| C19-C20-C21-C22 | 1.4(4)    |
| C19-C24-C25-C26 | -33.9(4)  |
| C20-C19-C24-C23 | 2.7(4)    |
| C20-C19-C24-C25 | -169.2(2) |
| C20-C21-C22-C23 | 2.4(4)    |
| C21-C22-C23-C24 | -3.6(4)   |
| C22-C23-C24-C19 | 0.9(4)    |
| C22-C23-C24-C25 | 173.5(2)  |
| C23-C24-C25-C26 | 154.0(3)  |
| C24-C19-C20-C21 | -3.9(4)   |
| C24-C25-C26-C5  | 167.5(3)  |
| C24-C25-C26-C16 | -10.8(4)  |
| C26-C5-C6-C7    | -176.1(3) |
| C26-C5-C6-C15   | 4.3(3)    |
| C26-C16-C17-C18 | -62.6(3)  |
| C26-C16-C17-C27 | 117.2(2)  |
| C27-C17-C18-C19 | -177.9(3) |
| C27-C28-C29-C30 | 175.5(3)  |
| C28-C15-C16-C17 | -1.9(3)   |

|                 |             |
|-----------------|-------------|
| C28-C15-C16-C26 | -119.6(2)   |
| C28-C29-C30-C8  | -33.0(4)    |
| C28-C29-C30-C31 | 151.0(3)    |
| C29-C30-C31-C11 | 178.9(3)    |
| C30-C8-C9-C10   | -4.0(4)     |
| C64-S5-C34-S6   | 61.6(2)     |
| C64-S5-C34-C43  | -123.1(3)   |
| C34-S5-C64-C32  | -88.5(3)    |
| C34-S6-C35-S7   | -9.30(17)   |
| C34-S6-C35-C36  | 168.5(2)    |
| C35-S6-C34-S5   | -178.27(16) |
| C35-S6-C34-C43  | 5.9(2)      |
| C35-S7-C43-S8   | 177.77(16)  |
| C35-S7-C43-C34  | -5.6(2)     |
| C35-C36-C37-C38 | -16.1(4)    |
| C35-C36-C37-C62 | 163.7(2)    |
| C35-C36-C53-C52 | -163.7(2)   |
| C35-C36-C53-C54 | 14.7(4)     |
| C36-C37-C38-C39 | -178.4(3)   |
| C36-C37-C62-C49 | 121.8(2)    |
| C36-C37-C62-C52 | 6.4(3)      |
| C36-C53-C54-C55 | 179.7(2)    |
| C37-C36-C53-C52 | 10.6(3)     |
| C37-C36-C53-C54 | -171.0(3)   |
| C37-C38-C39-C40 | -151.5(3)   |
| C37-C38-C39-C47 | 35.3(4)     |
| C38-C37-C62-C49 | -58.4(3)    |
| C38-C37-C62-C52 | -173.8(2)   |
| C38-C39-C40-C41 | -174.6(3)   |
| C38-C39-C47-C46 | 171.1(3)    |
| C38-C39-C47-C48 | -3.5(4)     |
| C39-C40-C41-C42 | 2.3(5)      |

|                 |            |
|-----------------|------------|
| C39-C47-C48-C49 | -29.9(4)   |
| C40-C39-C47-C46 | -2.0(4)    |
| C40-C39-C47-C48 | -176.6(3)  |
| C40-C41-C42-C46 | -0.7(5)    |
| C41-C42-C46-C47 | -2.2(4)    |
| C42-C46-C47-C39 | 3.6(4)     |
| C42-C46-C47-C48 | 178.6(3)   |
| C43-S7-C35-S6   | 9.13(16)   |
| C43-S7-C35-C36  | -168.6(2)  |
| C43-S8-C44-C45  | -68.7(2)   |
| C44-S8-C43-S7   | -75.04(19) |
| C44-S8-C43-C34  | 108.7(3)   |
| C46-C47-C48-C49 | 155.4(3)   |
| C47-C39-C40-C41 | -0.8(4)    |
| C47-C48-C49-C50 | 176.5(2)   |
| C47-C48-C49-C62 | -3.1(4)    |
| C48-C49-C50-O2  | 7.6(4)     |
| C48-C49-C50-C51 | -173.0(3)  |
| C48-C49-C62-C37 | 60.1(3)    |
| C48-C49-C62-C52 | 175.4(3)   |
| C49-C50-C51-C52 | -6.4(3)    |
| C49-C50-C51-C61 | 173.9(2)   |
| C50-C49-C62-C37 | -119.5(2)  |
| C50-C49-C62-C52 | -4.2(3)    |
| C50-C51-C52-C53 | 119.7(2)   |
| C50-C51-C52-C62 | 3.8(3)     |
| C50-C51-C61-C60 | -176.7(2)  |
| C51-C52-C53-C36 | -122.2(2)  |
| C51-C52-C53-C54 | 59.2(3)    |
| C51-C52-C62-C37 | 119.9(2)   |
| C51-C52-C62-C49 | 0.2(3)     |

|                 |           |
|-----------------|-----------|
| C52-C51-C61-C60 | 3.7(4)    |
| C52-C53-C54-C55 | -2.0(4)   |
| C53-C36-C37-C38 | 169.6(3)  |
| C53-C36-C37-C62 | -10.6(3)  |
| C53-C52-C62-C37 | 0.0(3)    |
| C53-C52-C62-C49 | -119.6(2) |
| C53-C54-C55-C56 | 152.0(3)  |
| C53-C54-C55-C60 | -36.5(4)  |
| C54-C55-C56-C57 | 172.6(2)  |
| C54-C55-C60-C59 | -169.4(2) |
| C54-C55-C60-C61 | 5.7(4)    |
| C55-C56-C57-C58 | -1.9(4)   |
| C55-C60-C61-C51 | 28.1(4)   |
| C56-C55-C60-C59 | 1.9(4)    |
| C56-C55-C60-C61 | 177.0(2)  |
| C56-C57-C58-C59 | 0.9(4)    |
| C57-C58-C59-C60 | 1.5(4)    |
| C58-C59-C60-C55 | -2.9(4)   |
| C58-C59-C60-C61 | -178.3(3) |
| C59-C60-C61-C51 | -156.8(3) |
| C60-C55-C56-C57 | 0.4(4)    |
| C61-C51-C52-C53 | -60.7(3)  |
| C61-C51-C52-C62 | -176.6(2) |
| C62-C37-C38-C39 | 1.8(4)    |
| C62-C49-C50-O2  | -172.8(2) |
| C62-C49-C50-C51 | 6.6(3)    |
| C62-C52-C53-C36 | -6.5(3)   |
| C62-C52-C53-C54 | 174.9(2)  |

## References

- 1 P. Mathey, F. Lirette, I. Fernández, L. Renn, R. T. Weitz and J. -F. Morin, *Angew. Chem. Int. Ed.*, 2023, **62**, e202216281.
- 2 V. B. R. Pedersen, M. Zalibera, F. Lirette, J. Ouellette, A. Lanza, I. Fernández, P. Rapta, J.-F. Morin and M. B. Nielsen, *Angew. Chem. Int. Ed.*, 2025, **64**, e20242227.
- 3 J. Granhøj, V. B. R. Pedersen, P. L. Krøll, L. Broløs and M. B. Nielsen, *J. Org. Chem.*, 2023, **88**, 12853–12856.
- 4 Bruker, *SAINT, V8.40B*, Bruker AXS Inc., Madison, Wisconsin, USA.
- 5 L. Krause, R. Herbst-Irmer, G. M. Sheldrick and D. Stalke, *J. Appl. Cryst.*, 2015, **48**, 3–10.
- 6 G. M. Sheldrick, *Acta Cryst.*, 2015, **A71**, 3–8.
- 7 G. M. Sheldrick, *Acta Cryst.*, 2015, **C71**, 3–8.
- 8 D. Kratzert, *FinalCif*, **V152**, <https://dkratzert.de/finalcif.html>.
- 9 C. R. Groom, I. J. Bruno, M. P. Lightfoot and S. C. Ward, *Acta Cryst.*, 2016, **B72**, 171–179.
